1 **Title**

2 Mitochondria-derived vesicles deliver antimicrobial payload to control phagosomal  
3 bacteria

4 **Authors/Affiliations**

5 Basel H. Abuaita\*, Tracey L. Schultz, and Mary X. O’Riordan\*

6 Department of Microbiology and Immunology, University of Michigan School of  
7 Medicine, Ann Arbor, MI 48109, USA

8 **Author List Footnotes**

9 **Contact Info**

10 \*Correspondence: [oriordan@umich.edu](mailto:oriordan@umich.edu)

11

12 **Summary**

13

14 Pathogenic bacteria taken up into the macrophage phagosome are the target of many  
15 anti-microbial effector molecules. Although mitochondria-derived antimicrobial effectors  
16 such as reactive oxygen species (mROS) are reported to aid in bacterial killing, it is  
17 unclear how these effectors reach bacteria within the phagosomal lumen. To examine  
18 the crosstalk between mitochondria and phagosomes, we monitored the production and  
19 the spatial localization of mROS during methicillin-resistant *Staphylococcus aureus*  
20 (MRSA) infection. We showed here mROS, specifically hydrogen peroxide (mH<sub>2</sub>O<sub>2</sub>) can

21 be delivered into phagosomes via infection-induced mitochondria-derived vesicles,  
22 which are generated in a Parkin-dependent manner. Accumulation of  $mH_2O_2$  in  
23 phagosomes required TLR signaling and the mitochondrial superoxide dismutase,  
24 Sod2, which converts superoxide into  $mH_2O_2$ . These data highlight a novel mechanism  
25 by which the mitochondrial redox capacity enhances macrophage antimicrobial function  
26 by delivering mitochondria-derived effector molecules into bacteria-containing  
27 phagosomes.

28

## 29 **Introduction**

30

31 Reactive oxygen species (ROS) play pivotal roles in signaling and defense of biological  
32 organisms. These highly reactive molecules oxidize lipids, proteins and other cellular  
33 constituents, leading to a spectrum of responses ranging from altered signaling to cell  
34 death. While ROS are constitutively generated and de-toxified during cellular  
35 metabolism, ROS levels acutely increase during cellular stress (Holmstrom and Finkel,  
36 2014), and can be a potent weapon in the host arsenal to control invading pathogens. In  
37 cells of the innate immune system, like macrophages, ROS are primarily generated by  
38 the phagocyte NADH oxidase and mitochondrial metabolism. Upon infection, the  
39 phagocyte oxidase multi-protein complex, also referred to as NOX2, can be recruited to  
40 phagosomal membranes to generate a burst of superoxide into the phagosome lumen  
41 (Winterbourn and Kettle, 2013). However, many bacterial pathogens, like  
42 *Mycobacterium tuberculosis*, *Salmonella enterica* serovar Typhimurium, *Coxiella*  
43 *burnetti*, and *Francisella tularensis* prevent the rapid NOX2-mediated burst either by

44 avoiding complex recruitment or by utilizing detoxification mechanisms (Celli and Zahrt,  
45 2013; Koster et al., 2017; Mertens and Samuel, 2012; Vazquez-Torres and Fang,  
46 2001). Mitochondrial ROS (mROS) can also contribute to bacterial killing (West et al.,  
47 2011), but how these reactive molecules reach bacteria within the macrophage  
48 phagosome is ill-defined.

49

50 ROS induction can be driven by cellular stress response pathways (Bronner et al.,  
51 2015), like the endoplasmic reticulum unfolded protein response (UPR), which is  
52 activated by the three ER sensors, PERK, ATF6 and IRE1 $\alpha$  (Zeeshan et al., 2016;  
53 Zhang and Kaufman, 2004). Indeed, many studies support an integral role for cellular  
54 stress pathways in modulating innate immune responses (Muralidharan and Mandrekar,  
55 2013). We recently showed that IRE1 $\alpha$  is critical for stimulating macrophage anti-  
56 microbial function (Abuaita et al., 2015). Specifically, IRE1 $\alpha$  activation resulted in  
57 sustained macrophage ROS production required for killing MRSA. Notably, IRE1 $\alpha$   
58 dependent killing was only partially NOX2-dependent, despite the well established role  
59 of NOX2 in neutrophil oxidative defenses against *Staphylococcus aureus* (Rigby and  
60 DeLeo, 2012). Since IRE1 $\alpha$  signaling induces mROS production (Tufanli et al., 2017),  
61 we hypothesized that the mechanism by which IRE1 $\alpha$  activation led to MRSA killing  
62 relied on mROS generation.

63

64 Here we show that infection of macrophages by MRSA stimulates IRE1 $\alpha$ -dependent  
65 production of mROS, specifically hydrogen peroxide mH<sub>2</sub>O<sub>2</sub>. Infection also triggers  
66 generation of Parkin- dependent mitochondrial-derived vesicles (MDVs), previously

67 described as a pathway for mitochondrial quality control (Soubannier et al., 2012a).  
68 These MDVs deliver the mitochondrial peroxide-generating enzyme, Sod2, into the  
69 bacteria-containing phagosome, controlling bacterial burden. Our findings reveal a  
70 mechanism by which programmed cellular stress responses repurpose a mitochondrial  
71 quality control mechanism to enable anti-microbial defense.

72

## 73 **Results**

74

### 75 **Induction of mROS by IRE1 $\alpha$ promotes macrophage bactericidal function**

76 We previously showed that MRSA infection stimulates macrophages to produce global  
77 ROS via the activation of the ER stress sensor IRE1 $\alpha$ , which was required *in vitro* and  
78 *in vivo* for effective MRSA killing (Abuaita et al., 2015). Although the phagocyte NADPH  
79 oxidase-2 (NOX2) complex contributed somewhat to MRSA killing by macrophages,  
80 IRE1 $\alpha$  stimulated robust macrophage bactericidal activity even in the absence of NOX2.  
81 Previous reports indicated that mitochondrial ROS (mROS) enhance macrophage  
82 bactericidal function (Geng et al., 2015; West et al., 2011), so we hypothesized that  
83 IRE1 $\alpha$ -dependent antimicrobial activity might rely specifically on mROS. To test this  
84 hypothesis, we assessed whether mROS was induced by macrophages in response to  
85 MRSA infection. First, we validated that MitoPY1, a mitochondrially targeted probe that  
86 fluoresces in response to mH<sub>2</sub>O<sub>2</sub> (Dickinson and Chang, 2008; Dickinson et al., 2013),  
87 was indeed mitochondrially restricted in macrophages. RAW264.7 cells were  
88 transfected with mito-mCherry and loaded with MitoPY1. MitoPY1 fluorescence intensity  
89 increased when macrophages were stimulated with exogenous H<sub>2</sub>O<sub>2</sub>, and the signal co-

90 localized with mito-mCherry (Fig. 1A). We also quantified the difference in mean  
91 fluorescence intensity (MFI) by flow cytometry (Fig. 1B). During MRSA infection,  
92 MitoPY1 fluorescence intensity increased over time, peaking at 4h pi (Fig. 1C). To  
93 determine whether IRE1 $\alpha$  was required for mH<sub>2</sub>O<sub>2</sub> induction by MRSA infection, we  
94 generated IRE1 $\alpha$ -deficient macrophages using CRISPR/Cas9 (Fig. 1D and S1). IRE1 $\alpha$   
95 deficiency suppressed the ability of macrophages to induce mH<sub>2</sub>O<sub>2</sub> during MRSA  
96 infection when compared to non-target control (Fig. 1E). To test the requirement for  
97 mROS in killing MRSA, infected macrophages were treated with the ROS scavenger,  
98 NecroX-5, which is primarily localized to mitochondria (Kim et al., 2010; Thu et al.,  
99 2016). Infected macrophages treated with NecroX-5 exhibited lower MitoPY1  
100 fluorescence than control-treated cells (Fig. 1F), and decreased capacity to kill MRSA  
101 (Fig. 1G). These data indicate that IRE1 $\alpha$  is critical for infection-induced mH<sub>2</sub>O<sub>2</sub>, and  
102 establishes a role for mROS in macrophage bactericidal function against MRSA.

103

#### 104 **Mitochondrial peroxide accumulation in phagosomes is TLR-dependent**

105 We reasoned that mH<sub>2</sub>O<sub>2</sub> could contribute to bactericidal function indirectly by signaling  
106 and/or by direct delivery to the phagosome. If direct delivery, we might expect to see  
107 mH<sub>2</sub>O<sub>2</sub> accumulate in the phagosome. To monitor mH<sub>2</sub>O<sub>2</sub> spatial localization during  
108 infection, we imaged live cells stimulated with viable MRSA, killed MRSA or latex beads.  
109 Macrophages were pulsed with MitoPY1 and chased 4h post-phagocytosis (Fig. 2A).  
110 Hydrogen peroxide increased within the mitochondrial network during infection with live  
111 or fixed MRSA, but not with beads. We also observed smaller MitoPy1<sup>+</sup> puncta  
112 throughout the cell. Notably, mH<sub>2</sub>O<sub>2</sub> accumulated in MRSA-containing phagosomes

113 (Fig. 2A and 2B). To visualize the dynamic distribution of  $mH_2O_2$  during infection, we  
114 performed time-lapse imaging of infected macrophages pre-loaded with MitoPY1 (Movie  
115 S1). By 10 min pi, the MitoPY1 signal within the mitochondrial network had increased.  
116 MitoPy1<sup>+</sup> puncta first associated with the bacterial phagosome at approximately 50 min  
117 pi, followed by accumulation of probe within the bacteria-containing phagosome (Fig.  
118 2C and Movie S1). These data suggest that mitochondrially-derived hydrogen peroxide  
119 accumulates within phagosomes, and reveal the possibility that  $mH_2O_2$  may contribute  
120 to macrophage bactericidal effector function through a direct delivery mechanism.

121  
122 Mitochondrial ROS induction in macrophages occurs when cells internalize beads  
123 conjugated to Toll-like receptor (TLR) ligands (TLR2 and TLR4), but not beads alone  
124 (West et al., 2011). To test whether TLR signaling was required for  $mH_2O_2$  generation  
125 and accumulation within MRSA-containing phagosomes, we measured MitoPY1  
126 fluorescence intensity in wild-type (WT) and TLR2/4/9-deficient bone marrow-derived  
127 macrophages (BMDMs) during MRSA infection. We observed increased overall  $mH_2O_2$   
128 in both WT and TLR2/4/9 deficient BMDMs during MRSA infection, indicating that  
129  $mH_2O_2$  induction is largely independent of TLR2/4/9 signaling (Fig. S2A). However,  
130 TLR2/4/9-deficient macrophages failed to kill MRSA (Fig. S2B) and MitoPY1  
131 accumulation in their MRSA-containing phagosomes was decreased compared to WT  
132 macrophages (Fig. 2D and 2E), indicating that TLR signaling controls  $mH_2O_2$  delivery to  
133 or accumulation within bacteria-containing phagosomes.

134

135 **Bacterial infection triggers Parkin-dependent generation of mitochondrial-derived**  
136 **vesicles**

137 Recent studies have revealed that mitochondrial constituents can be selectively  
138 transported to other intracellular compartments by small mitochondrial-derived vesicles  
139 (MDVs) (McLelland et al., 2014; Soubannier et al., 2012a). MDVs form in an early  
140 dynamin related protein 1 (Drp1)-independent response to increased oxidative stress,  
141 and are positive for mitochondrial markers, like Tom20. MDVs may function as a quality  
142 control mechanism by delivering damaged mitochondrial components to the  
143 endolysosomal pathway (Sugiura et al., 2014). A subset of MDVs associate with  
144 peroxisomes, and may represent a mechanism of communication between these two  
145 organelles (Neuspiel et al., 2008). Since infection increases  $mH_2O_2$ , we reasoned that  
146 could trigger generation of MDVs, a potential mechanism to deliver antimicrobial  
147 content from the mitochondria to the phagosome. To test this hypothesis, we first  
148 assessed whether MDVs are induced by MRSA infection. Macrophages were infected  
149 with MRSA, and subjected to immunofluorescence analysis by high-resolution confocal  
150 microscopy using a Tom20-specific antibody. MRSA infection stimulated an increase of  
151 small Tom20<sup>+</sup> particles, here referred to as MDVs, compared to bead-containing  
152 macrophages (Fig. 3A and 3B, Fig. S3). The Parkinson's Disease associated protein,  
153 Parkin, regulates biogenesis of a subset of MDVs (McLelland et al., 2014). We therefore  
154 tested the requirement for Parkin in generating infection-induced MDVs. WT and Parkin-  
155 deficient (*Park2*<sup>-/-</sup>) BMDM were infected with MRSA, and accumulation of Tom20<sup>+</sup> MDVs  
156 visualized by confocal microscopy. MRSA-infected *Park2*<sup>-/-</sup> BMDM had significantly  
157 lower numbers of Tom20<sup>+</sup> MDVs compared to WT BMDM (Fig. 3C and 3D).

158 Collectively, these results show that MRSA infection induces formation of Tom20<sup>+</sup>  
159 MDVs through a Parkin-dependent mechanism.

160

161 **Parkin controls mH<sub>2</sub>O<sub>2</sub> accumulation in phagosomes and promotes bactericidal**  
162 **effector function**

163 Polymorphic alleles of *Park2* can mediate susceptibility to microbial infection (Al-  
164 Qahtani et al., 2016; Manzanillo et al., 2013). We hypothesized that MDVs could  
165 enhance macrophage bactericidal function by facilitating mH<sub>2</sub>O<sub>2</sub> accumulation within  
166 phagosomes. We first measured the requirement for Parkin in mH<sub>2</sub>O<sub>2</sub> accumulation in  
167 phagosomes. Upon infection, Parkin-deficient macrophages produced higher levels of  
168 mH<sub>2</sub>O<sub>2</sub> than WT macrophages, indicating that Parkin is not necessary for mH<sub>2</sub>O<sub>2</sub>  
169 induction (Fig. 3E). Notably, despite higher overall levels of mH<sub>2</sub>O<sub>2</sub>, Parkin-deficient  
170 macrophages displayed only minimal accumulation of MitoPY1 in phagosomes  
171 compared to WT macrophages (Fig. 3F and 3G). To evaluate the contribution of Parkin  
172 to macrophage bactericidal capacity against MRSA, WT and *Park2*<sup>-/-</sup> BMDM were  
173 infected with MRSA to assess killing. Parkin-deficient macrophages were less capable  
174 of killing MRSA compared to WT macrophages (Fig. 3H). Parkin can regulate  
175 mitochondria quality control by inducing mitophagy (Matsuda et al., 2010), or by  
176 formation of MDVs (McLelland et al., 2014). To determine if the Parkin-dependent killing  
177 mechanism we observed involved mitophagy, we measured macrophage bactericidal  
178 function in the presence of Mdivi-1, a small molecule of Drp1, required for mitophagy  
179 (Narendra et al., 2008), but not MDV scission (Soubannier et al., 2012a). Macrophages  
180 treated with Mdivi-1 killed MRSA as efficiently as DMSO-treated macrophages (Fig. 3I).



181 These data indicate that Parkin-dependent generation of MDV enables accumulation of  
182 bactericidal mH<sub>2</sub>O<sub>2</sub> in the macrophage phagosome.

183

184 We then tested the role of Parkin in innate immunity against MRSA using a  
185 subcutaneous infection model, where innate immune defenses are essential for  
186 bacterial clearance (Tseng et al., 2011). WT and Parkin-deficient mice were inoculated  
187 with 10<sup>7</sup> MRSA subcutaneously into the shaved flank. Skin lesions were excised at 3  
188 days pi, and bacterial burden and pro-inflammatory cytokines were measured. Lesions  
189 from Parkin-deficient mice yielded higher bacterial numbers (Fig. 4A), and increased  
190 levels of KC and IL-1β compared to WT mice (Fig. 4B and 4C). These data support a  
191 role for Parkin in innate immunity against MRSA infection *in vivo* and suggest that  
192 parkin mediates macrophage bactericidal function via delivering Tom20<sup>+</sup> MDV into  
193 phagosomes.

194

### 195 **Inhibition of phagosomal acidification enhances MDV-mediated bactericidal** 196 **capacity**

197 Phagosomal acidification enhances macrophage antimicrobial function by reducing  
198 intracellular replication of certain pathogens such as *M. tuberculosis* (Sullivan et al.,  
199 2012). Conversely, other intracellular bacterial pathogens, such as *Salmonella enterica*  
200 serovar Typhimurium, are killed more efficiently when cells are treated with Bafilomycin  
201 A1 (Baf A1), an inhibitor of the vacuolar ATPase that prevents acidification and  
202 phagolysosomal fusion (Rathman et al., 1996). Notably, under stimulating conditions,  
203 Tom20<sup>+</sup> MDVs accumulate when cells are treated with BafA1, presumably by

204 preventing their resolution into the lysosomal network and subsequent degradation  
205 (Soubannier et al., 2012a; Sugiura et al., 2014). Therefore, we hypothesized that  
206 blockade of acidification and protein degradation in lysosomes with Baf A1 (Yoshimori  
207 et al., 1991) would increase MDV accumulation and thereby enhance bactericidal  
208 mROS delivery into MRSA-containing phagosomes. To determine if MDV accumulation  
209 enhanced macrophage bactericidal function, we first quantified MDV induction in  
210 infected macrophages treated with BafA1. We observed that BafA1 treatment increased  
211 Tom20<sup>+</sup> MDV accumulation in MRSA-infected macrophages compared to DMSO-  
212 treated macrophages (Fig. 5A and 5B). BafA1-treated macrophages exhibited higher  
213 levels of mROS in MRSA-containing phagosomes and killed MRSA more efficiently  
214 compared to DMSO-treated cells (Fig. 5C-E). To further investigate how MDVs  
215 associate with MRSA-containing phagosomes, we performed transmission electron  
216 microscopy (TEM) on MRSA-infected macrophages treated with or without BafA1 at 4h  
217 pi. We could readily observe MRSA-containing phagosomes containing double  
218 membrane-bound vesicles (Fig. 5F). When cells were treated with BafA1, MRSA  
219 phagosomes appeared more spacious and the double membrane-bound vesicles could  
220 be easily observed inside the phagosome. To determine if these vesicles were derived  
221 from mitochondria, we performed immunogold labeling using anti-Tom20 antibody,  
222 followed by TEM. Although the immunogold fixation conditions decreased definition of  
223 phagosomal membranes, Tom20<sup>+</sup> particles were observed in close proximity to the  
224 bacterial surface within the phagosomal space (Fig. S4). Collectively, these data  
225 suggest that preventing lysosomal acidification and protein degradation increased MDV  
226 accumulation and mH<sub>2</sub>O<sub>2</sub> levels in the phagosome to augment MRSA killing.

227

228 **Sod2 is required for generation of bactericidal mH<sub>2</sub>O<sub>2</sub> and is delivered to bacteria-**  
229 **containing phagosomes**

230 Hydrogen peroxide is constitutively generated in the mitochondria from superoxide  
231 produced by electron transport that is converted by the mitochondrial manganese  
232 superoxide dismutase (Sod2) (Murphy, 2009). We therefore hypothesized that Sod2  
233 was required for the bactericidal mH<sub>2</sub>O<sub>2</sub> induced by MRSA infection. To define the  
234 spatial localization of Sod2 positive compartments relative to phagosomes, we  
235 performed confocal immunofluorescence microscopy on macrophages infected with  
236 MRSA or beads, staining with Sod2- and Lamp1-specific antibodies (Fig. 6A). Sod2  
237 localized to the mitochondrial network in macrophages (Fig. S5) and large Sod2<sup>+</sup>  
238 network objects were juxtaposed to both bead- and MRSA-containing phagosomes.  
239 However, small Sod2<sup>+</sup> vesicles were induced during MRSA infection, and were present  
240 within MRSA-containing phagosomes. To further quantify Sod2<sup>+</sup> vesicle accumulation in  
241 MRSA-containing phagosomes, we enumerated Sod2<sup>+</sup> MDV located within a 1µm  
242 radius around bead- and MRSA-containing phagosomes, which were delineated by  
243 Lamp1<sup>+</sup> staining, and found that MRSA infection increased Sod2<sup>+</sup> MDV within  
244 phagosomes (Fig. 6B and 6C). To determine whether Sod2 was required for  
245 bactericidal activity, we stably knocked down Sod2 in RAW264.7 macrophages (Sod2  
246 KD), which was confirmed by immunoblot analysis (Fig. 6D). We first tested the  
247 requirement of Sod2 in hydrogen peroxide and superoxide generation during MRSA  
248 infection (Fig. 6E, S6A and S6B). Compared to control cells, Sod2 KD cells failed to  
249 produce hydrogen peroxide upon MRSA infection while produced higher level of

250 superoxide regardless of MRSA infection. Although Sod2 knockdown increased  
251 mitochondria superoxide production, it did not interfere with host cell death during  
252 MRSA infection (Fig. S6C). Importantly, Sod2 depletion impaired macrophage killing of  
253 MRSA compared to NT-control cells (Fig. 6F). Together, these results suggest that  
254 Sod2 enhances MRSA killing via generation of  $mH_2O_2$ , which is delivered by MDVs to  
255 bacteria-containing phagosomes.

256

## 257 **DISCUSSION**

258

259 The generation of anti-microbial reactive oxygen intermediates is an integral weapon in  
260 the innate immune arsenal. We find that infection by MRSA stimulates the production of  
261 mitochondrial ROS, specifically mitochondrial hydrogen peroxide. Our results identify  
262 Sod2 as a key enzyme responsible for infection-induced  $mH_2O_2$  generation. Moreover,  
263 these studies reveal delivery of the Sod2/ $mH_2O_2$  payload to the phagosome by  
264 mitochondria-derived vesicles as a novel mechanism for anti-microbial killing.  
265 Stimulation of  $mH_2O_2$ -containing MDV during infection required TLR signaling and  
266 employed a Parkin-dependent pathway. Taken together, our data support a model  
267 where Sod2-driven  $mH_2O_2$  production and accumulation via MDV delivery establish a  
268 potent killing ground for bacterial pathogens within the macrophage phagosome.

269

270 Generation of MDV has been described as a quality control mechanism that could  
271 transport damaged respiratory chain complexes from mitochondria to the  
272 endolysosomal compartment for degradation (Soubannier et al., 2012a). More recent

273 studies reveal that MDV can carry out diverse functions within the cell, and likely  
274 represent multiple vesicle populations with distinct cargo related to their function.  
275 Sugira, *et al*, provided evidence for MDV generation as a critical step in peroxisome  
276 biogenesis, where MDV containing the peroxisomal proteins, Pex3 and Pex14, fuse with  
277 ER-derived vesicles, containing Pex16, resulting in import-competent organelles  
278 (Sugiura et al., 2017). This model of peroxisome biogenesis adds a new dimension to  
279 our understanding of how MDVs carry out mitochondrial communication with other  
280 organelles. Our work further identifies the phagosome as a new destination for MDVs  
281 that is revealed by infection.

282

283 Soubannier *et al* showed that different proteins are incorporated in MDVs when  
284 mitochondria are stressed with different stimuli, implying the existence of mechanisms  
285 to package and transport specific cargos. For instance, exogenous ROS applied to  
286 isolated mitochondria results in MDVs enriched in the outer membrane protein, VDAC.  
287 However, when ROS is generated by isolated mitochondria via inhibition of complex III  
288 by Antimycin A, MDVs carried complex III subunit core2 without enrichment of VDAC  
289 (Soubannier et al., 2012b). A recent study showed that in response to heat shock or  
290 LPS, MDVs delivered mitochondrial antigens to antigen-loading compartment  
291 independently of Parkin (Matheoud et al., 2016). In contrast, when cells are treated with  
292 Antimycin A to stimulate mitochondrial ROS production, MDVs are targeted to  
293 lysosomes in a Parkin-dependent manner (McLelland et al., 2014). In the context of  
294 infection, our data demonstrated that MDVs are generated in a Parkin-dependent  
295 manner, similar to MDVs destined for lysosomes. Moreover, we showed that infection-

296 induced MDVs contain mitochondria-specific enzyme, Sod2. Collectively, our data and  
297 others support the idea that specific stimuli define the packaging and destination of  
298 MDV subsets.

299

300 In the context of the mitochondrial matrix, Sod2 cooperates with other enzymes and  
301 anti-oxidant proteins to detoxify superoxide generated by oxidative  
302 metabolism. Notably, dysregulation of Sod2 is associated with many human diseases,  
303 some of which are associated with increased inflammation (Flynn and Melov, 2013).  
304 Altering the spatial distribution of Sod2 could disrupt the coordinated ROS detoxification  
305 process, resulting in increased hydrogen peroxide production without the capacity to  
306 further reduce to water. Previous studies provide some evidence to support this  
307 hypothesis. Overexpression of Sod2 increased the steady state of hydrogen peroxide in  
308 cancer cells, and may contribute to tumor invasion and metastasis (Nelson et al., 2003;  
309 Ranganathan et al., 2001). In contrast, decreasing Sod2 activity in Sod2-heterozygous  
310 mice led to higher production of superoxide radical when measured by aconitase  
311 activity, which correlate with an increase in mitochondrial oxidative damage (Williams et  
312 al., 1998). Consistent with these data, our results showed that decreasing macrophage  
313 Sod2 leads to elevation of steady state levels of mitochondrial superoxide and  
314 decreased generation of hydrogen peroxide during MRSA infection. As a consequence,  
315 Sod2-deficient macrophages (Sod2 KD) failed to kill MRSA. Although we were not able  
316 to successfully generate live Sod2-deficient mice, studies of Sod2 knockdown in  
317 zebrafish demonstrate a protective role for Sod2 during infection by *Pseudomonas*  
318 *aeruginosa* (Peterman et al., 2015). Our studies have identified MDVs as a new delivery

319 mechanism by which antimicrobial effectors can be trafficked into the macrophage  
320 phagosome. We propose that removal of a subset of Sod2 protein from the coordinated  
321 redox environment of the mitochondrial network through packaging into MDVs allows  
322 repurposing of this enzyme from detoxification to anti-microbial defense.

323

### 324 **Acknowledgments**

325 This work was supported by NIH award R21 AI101777 (M.X.O). B.H.A. was supported  
326 by NIH T32 AI007538, T32 HLL007517 and an American Heart Association Post-  
327 doctoral fellowship. We thank O’Riordan lab members for many helpful discussions. We  
328 gratefully acknowledge the Center for Live Cell Imaging (CLCI), Microscopy and Image  
329 Analysis Laboratory (MIL) and Cancer Center Immunology Core at the University of  
330 Michigan Medical School. We thank Dr. T. Merkel (FDA) for *Tlr2/4/9<sup>-/-</sup>* femurs.

331

### 332 **Author Contributions**

333 B.A. performed the experiments; B.A. and M.O. designed the experiments and wrote  
334 the manuscript; T.S. assisted in experimental preparation.

335

### 336 **Declaration of Interests**

337 The authors declare no competing interests.

338

### 339 **References**

340 Abuaita, B.H., Burkholder, K.M., Boles, B.R., and O’Riordan, M.X. (2015). The  
341 Endoplasmic Reticulum Stress Sensor Inositol-Requiring Enzyme 1alpha Augments  
342 Bacterial Killing through Sustained Oxidant Production. *mBio* 6, e00705.

- 343 Al-Qahtani, A.A., Al-Anazi, M.R., Al-Zoghaibi, F.A., Abdo, A.A., Sanai, F.M., Al-  
344 Hamoudi, W.K., Alswat, K.A., Al-Ashgar, H.I., Khan, M.Q., Albenmoussa, A., *et al.*  
345 (2016). PARK2 polymorphisms predict disease progression in patients infected with  
346 hepatitis C virus. *Ann Hepatol* 15, 824-833.
- 347 Boles, B.R., and Horswill, A.R. (2008). Agr-mediated dispersal of *Staphylococcus*  
348 *aureus* biofilms. *PLoS pathogens* 4, e1000052.
- 349 Bronner, D.N., Abuaita, B.H., Chen, X., Fitzgerald, K.A., Nunez, G., He, Y., Yin, X.M.,  
350 and O'Riordan, M.X. (2015). Endoplasmic Reticulum Stress Activates the  
351 Inflammasome via NLRP3- and Caspase-2-Driven Mitochondrial Damage. *Immunity* 43,  
352 451-462.
- 353 Celli, J., and Zahrt, T.C. (2013). Mechanisms of *Francisella tularensis* intracellular  
354 pathogenesis. *Cold Spring Harb Perspect Med* 3, a010314.
- 355 Dickinson, B.C., and Chang, C.J. (2008). A targetable fluorescent probe for imaging  
356 hydrogen peroxide in the mitochondria of living cells. *J Am Chem Soc* 130, 9638-9639.
- 357 Dickinson, B.C., Lin, V.S., and Chang, C.J. (2013). Preparation and use of MitoPY1 for  
358 imaging hydrogen peroxide in mitochondria of live cells. *Nat Protoc* 8, 1249-1259.
- 359 Flynn, J.M., and Melov, S. (2013). SOD2 in mitochondrial dysfunction and  
360 neurodegeneration. *Free Radic Biol Med* 62, 4-12.
- 361 Geng, J., Sun, X., Wang, P., Zhang, S., Wang, X., Wu, H., Hong, L., Xie, C., Li, X.,  
362 Zhao, H., *et al.* (2015). Kinases Mst1 and Mst2 positively regulate phagocytic induction  
363 of reactive oxygen species and bactericidal activity. *Nature immunology* 16, 1142-1152.
- 364 Holmstrom, K.M., and Finkel, T. (2014). Cellular mechanisms and physiological  
365 consequences of redox-dependent signalling. *Nat Rev Mol Cell Biol* 15, 411-421.
- 366 Kim, H.J., Koo, S.Y., Ahn, B.H., Park, O., Park, D.H., Seo, D.O., Won, J.H., Yim, H.J.,  
367 Kwak, H.S., Park, H.S., *et al.* (2010). NecroX as a novel class of mitochondrial reactive  
368 oxygen species and ONOO(-) scavenger. *Arch Pharm Res* 33, 1813-1823.
- 369 Koster, S., Upadhyay, S., Chandra, P., Papavinasasundaram, K., Yang, G., Hassan, A.,  
370 Grigsby, S.J., Mittal, E., Park, H.S., Jones, V., *et al.* (2017). *Mycobacterium tuberculosis*  
371 is protected from NADPH oxidase and LC3-associated phagocytosis by the LCP protein  
372 CpsA. *Proc Natl Acad Sci U S A* 114, E8711-E8720.
- 373 Kulpa, D.A., Del Cid, N., Peterson, K.A., and Collins, K.L. (2013). Adaptor protein 1  
374 promotes cross-presentation through the same tyrosine signal in major  
375 histocompatibility complex class I as that targeted by HIV-1. *J Virol* 87, 8085-8098.
- 376 Manzanillo, P.S., Ayres, J.S., Watson, R.O., Collins, A.C., Souza, G., Rae, C.S.,  
377 Schneider, D.S., Nakamura, K., Shiloh, M.U., and Cox, J.S. (2013). The ubiquitin ligase  
378 parkin mediates resistance to intracellular pathogens. *Nature* 501, 512-516.



- 379 Matheoud, D., Sugiura, A., Bellemare-Pelletier, A., Laplante, A., Rondeau, C., Chemali,  
380 M., Fazel, A., Bergeron, J.J., Trudeau, L.E., Burelle, Y., *et al.* (2016). Parkinson's  
381 Disease-Related Proteins PINK1 and Parkin Repress Mitochondrial Antigen  
382 Presentation. *Cell* 166, 314-327.
- 383 Matsuda, N., Sato, S., Shiba, K., Okatsu, K., Saisho, K., Gautier, C.A., Sou, Y.S., Saiki,  
384 S., Kawajiri, S., Sato, F., *et al.* (2010). PINK1 stabilized by mitochondrial depolarization  
385 recruits Parkin to damaged mitochondria and activates latent Parkin for mitophagy. *J*  
386 *Cell Biol* 189, 211-221.
- 387 McLelland, G.L., Soubannier, V., Chen, C.X., McBride, H.M., and Fon, E.A. (2014).  
388 Parkin and PINK1 function in a vesicular trafficking pathway regulating mitochondrial  
389 quality control. *EMBO J* 33, 282-295.
- 390 Mertens, K., and Samuel, J.E. (2012). Defense mechanisms against oxidative stress in  
391 *Coxiella burnetii*: adaptation to a unique intracellular niche. *Adv Exp Med Biol* 984, 39-  
392 63.
- 393 Muralidharan, S., and Mandrekar, P. (2013). Cellular stress response and innate  
394 immune signaling: integrating pathways in host defense and inflammation. *Journal of*  
395 *leukocyte biology* 94, 1167-1184.
- 396 Murphy, M.P. (2009). How mitochondria produce reactive oxygen species. *Biochem J*  
397 417, 1-13.
- 398 Nelson, K.K., Ranganathan, A.C., Mansouri, J., Rodriguez, A.M., Providence, K.M.,  
399 Rutter, J.L., Pumiglia, K., Bennett, J.A., and Melendez, J.A. (2003). Elevated sod2  
400 activity augments matrix metalloproteinase expression: evidence for the involvement of  
401 endogenous hydrogen peroxide in regulating metastasis. *Clin Cancer Res* 9, 424-432.
- 402 Neuspiel, M., Schauss, A.C., Braschi, E., Zunino, R., Rippstein, P., Rachubinski, R.A.,  
403 Andrade-Navarro, M.A., and McBride, H.M. (2008). Cargo-selected transport from the  
404 mitochondria to peroxisomes is mediated by vesicular carriers. *Curr Biol* 18, 102-108.
- 405 Peterman, E.M., Sullivan, C., Goody, M.F., Rodriguez-Nunez, I., Yoder, J.A., and Kim,  
406 C.H. (2015). Neutralization of mitochondrial superoxide by superoxide dismutase 2  
407 promotes bacterial clearance and regulates phagocyte numbers in zebrafish. *Infection*  
408 *and immunity* 83, 430-440.
- 409 Ranganathan, A.C., Nelson, K.K., Rodriguez, A.M., Kim, K.H., Tower, G.B., Rutter, J.L.,  
410 Brinckerhoff, C.E., Huang, T.T., Epstein, C.J., Jeffrey, J.J., *et al.* (2001). Manganese  
411 superoxide dismutase signals matrix metalloproteinase expression via H<sub>2</sub>O<sub>2</sub>-dependent  
412 ERK1/2 activation. *The Journal of biological chemistry* 276, 14264-14270.
- 413 Rathman, M., Sjaastad, M.D., and Falkow, S. (1996). Acidification of phagosomes  
414 containing *Salmonella typhimurium* in murine macrophages. *Infection and immunity* 64,  
415 2765-2773.

- 416 Rigby, K.M., and DeLeo, F.R. (2012). Neutrophils in innate host defense against  
417 *Staphylococcus aureus* infections. *Semin Immunopathol* 34, 237-259.
- 418 Sanjana, N.E., Shalem, O., and Zhang, F. (2014). Improved vectors and genome-wide  
419 libraries for CRISPR screening. *Nature methods* 11, 783-784.
- 420 Soubannier, V., McLelland, G.L., Zunino, R., Braschi, E., Rippstein, P., Fon, E.A., and  
421 McBride, H.M. (2012a). A vesicular transport pathway shuttles cargo from mitochondria  
422 to lysosomes. *Curr Biol* 22, 135-141.
- 423 Soubannier, V., Rippstein, P., Kaufman, B.A., Shoubbridge, E.A., and McBride, H.M.  
424 (2012b). Reconstitution of mitochondria derived vesicle formation demonstrates  
425 selective enrichment of oxidized cargo. *PLoS One* 7, e52830.
- 426 Sugiura, A., Mattie, S., Prudent, J., and McBride, H.M. (2017). Newly born peroxisomes  
427 are a hybrid of mitochondrial and ER-derived pre-peroxisomes. *Nature* 542, 251-254.
- 428 Sugiura, A., McLelland, G.L., Fon, E.A., and McBride, H.M. (2014). A new pathway for  
429 mitochondrial quality control: mitochondrial-derived vesicles. *EMBO J* 33, 2142-2156.
- 430 Sullivan, J.T., Young, E.F., McCann, J.R., and Braunstein, M. (2012). The  
431 *Mycobacterium tuberculosis* SecA2 system subverts phagosome maturation to promote  
432 growth in macrophages. *Infection and immunity* 80, 996-1006.
- 433 Thu, V.T., Kim, H.K., Long le, T., Nyamaa, B., Song, I.S., Thuy, T.T., Huy, N.Q.,  
434 Marquez, J., Kim, S.H., Kim, N., *et al.* (2016). NecroX-5 protects mitochondrial oxidative  
435 phosphorylation capacity and preserves PGC1alpha expression levels during  
436 hypoxia/reoxygenation injury. *Korean J Physiol Pharmacol* 20, 201-211.
- 437 Tseng, C.W., Sanchez-Martinez, M., Arruda, A., and Liu, G.Y. (2011). Subcutaneous  
438 infection of methicillin resistant *Staphylococcus aureus* (MRSA). *J Vis Exp*.
- 439 Tufanli, O., Telkoparan Akillilar, P., Acosta-Alvear, D., Kocaturk, B., Onat, U.I., Hamid,  
440 S.M., Cimen, I., Walter, P., Weber, C., and Erbay, E. (2017). Targeting IRE1 with small  
441 molecules counteracts progression of atherosclerosis. *Proc Natl Acad Sci U S A* 114,  
442 E1395-E1404.
- 443 Vazquez-Torres, A., and Fang, F.C. (2001). *Salmonella* evasion of the NADPH  
444 phagocyte oxidase. *Microbes Infect* 3, 1313-1320.
- 445 West, A.P., Brodsky, I.E., Rahner, C., Woo, D.K., Erdjument-Bromage, H., Tempst, P.,  
446 Walsh, M.C., Choi, Y., Shadel, G.S., and Ghosh, S. (2011). TLR signalling augments  
447 macrophage bactericidal activity through mitochondrial ROS. *Nature* 472, 476-480.
- 448 Williams, M.D., Van Remmen, H., Conrad, C.C., Huang, T.T., Epstein, C.J., and  
449 Richardson, A. (1998). Increased oxidative damage is correlated to altered  
450 mitochondrial function in heterozygous manganese superoxide dismutase knockout  
451 mice. *The Journal of biological chemistry* 273, 28510-28515.

452 Winterbourn, C.C., and Kettle, A.J. (2013). Redox reactions and microbial killing in the  
453 neutrophil phagosome. *Antioxid Redox Signal* 18, 642-660.

454 Yoshimori, T., Yamamoto, A., Moriyama, Y., Futai, M., and Tashiro, Y. (1991).  
455 Bafilomycin A1, a specific inhibitor of vacuolar-type H(+)-ATPase, inhibits acidification  
456 and protein degradation in lysosomes of cultured cells. *The Journal of biological*  
457 *chemistry* 266, 17707-17712.

458 Zeeshan, H.M., Lee, G.H., Kim, H.R., and Chae, H.J. (2016). Endoplasmic Reticulum  
459 Stress and Associated ROS. *Int J Mol Sci* 17, 327.

460 Zhang, K., and Kaufman, R.J. (2004). Signaling the unfolded protein response from the  
461 endoplasmic reticulum. *The Journal of biological chemistry* 279, 25935-25938.

462

## 463 **Figure Legends**

464

### 465 **Figure 1. MRSA infection stimulates bactericidal mH<sub>2</sub>O<sub>2</sub> via IRE1 $\alpha$**

466 (A) Representative live fluorescent images of macrophages transfected with mCherry-  
467 Mito-7 encoded plasmid, pulsed with MitoPY1 for 1h and chased with H<sub>2</sub>O<sub>2</sub> (100  $\mu$ M) or  
468 left untreated. Images were acquired by Olympus IX-70 inverted microscope and  
469 analyzed by MetaMorph for Olympus imaging software.

470 (B) Flow Cytometry mean fluorescent intensity (MFI) of macrophages after pulse with  
471 MitoPY1 for 1h and chased with H<sub>2</sub>O<sub>2</sub> or left untreated.

472 (C) Time course measurement of MFI of macrophages when pulsed with MitoPY1 and  
473 an infected with MRSA and monitored over time via flow cytometry.

474 (D) Immunoblots of IRE1 $\alpha$  and GAPDH from cell lysates from NT-control and IRE1 $\alpha$  KO  
475 macrophages.

476 (E) MFI of IRE1 $\alpha$  KO macrophages and NT-control after labeling with MitoPY1 followed  
477 by MRSA infection and analyzed after 4h.

478 (F) MFI of macrophages labeled with MitoPY1 for 1h and infected with MRSA for 4h in  
479 the presence and absence of mROS scavenger NecroX-5.

480 (G) Percent of intracellular MRSA killing by macrophages in the presence and absence  
481 of NecroX-5. Percent killing was calculated by the following formula  $[1 - (\text{CFU}_{\text{indicated time}}$   
482  $\text{points} / \text{CFU}_{1\text{h pi}})] \times 100$ , which represents the percent difference in CFU at indicated time  
483 point relative to 1h pi.

484 MFI of MitoPY1 quantification was determined by using FlowJo software, representing a  
485 geometric mean. MFI of each condition was subtracted from MFI obtained from  
486 unstained cells. Graphs are presented as mean of  $n \geq 3$  independent experiments +/- SD.  
487 pValue: \* < 0.05, \*\* < 0.01 and \*\*\* < 0.001.

488

489 **Figure 2. TLR signaling controls mH<sub>2</sub>O<sub>2</sub> accumulation in the bacterial phagosome**

490 (A) Representative fluorescent microscopy images of macrophages when pulsed with  
491 MitoPY1 (green) for 1h and chased with beads (red) or live and dead MRSA-mcherry  
492 (red) infection for 4h. Images were acquired by an Olympus IX-70 inverted live-cell  
493 fluorescence microscope and analyzed by MetaMorph imaging software.

494 (B) Quantification of mean fluorescent intensity (MFI) of MitoPY1 associated with  
495 macrophage phagosomes using imageJ software. Phagosomes were defined by the  
496 area in the cell where red fluorescent beads or MRSA are localized.

497 (C) Time lapse imaging of macrophages pulsed with MitoPY1 for 1h (green) and then  
498 infected with MRSA-mCherry (red). Time clock Minutes : Seconds.

499 (D) Live microscopy images of wild type (WT) and TLR 2/4/9 deficient (TLR2/4/9 KO)  
500 macrophages pulsed with MitoPY1 (green) for 1h and then infected with MRSA-  
501 mCherry (red) for 4h.

502 (E) Quantification of MFI of MitoPY1 associated with phagosomes from WT and  
503 TLR2/4/9 deficient macrophages using similar criteria as in panel B.

504 Graphs represent averages of MitoPY1 MFI from at least 305 phagosomes pooled from  
505 at least three independent experiments. Error bars represent standard error of the mean  
506 (SEM). pValue: \* < 0.05 and \*\*\*\* < 0.0001.

507

508 **Figure 3. Infection induced Parkin-dependent MDVs contribute to MRSA killing**

509 (A) Confocal microscopy representative images of macrophages stimulated with beads  
510 (red) or infected with MRSA (Red) for 4h and stained with Tom20 (green) antibody.  
511 Images were acquired by Leica TCS SP8 scanning confocal microscope and  
512 deconvoluted using Huygens essential software. Right panel are processed images  
513 after subtraction of Tom20 positive large objects (surface area > 0.4  $\mu\text{m}^2$ ).

514 (B) Quantification of Tom20 positive smaller objects (surface area < 0.4  $\mu\text{m}^2$ ) per  
515 macrophage when stimulated with beads or infected with MRSA. Decovoluted confocal  
516 images were processed by Huygens essential software using the following criteria; 10%  
517 threshold, 10% seed and garbage of 50. Tom20 positive objects with surface area  
518 larger than 0.4  $\mu\text{m}^2$  were filtered out and the remaining objects were enumerated per  
519 cell basis. Graphs represent means of at least 107 cells pooled from three independent  
520 experiments +/- SEM.

521 (C) Representative confocal microscopy images of WT and Parkin deficient (*Parkin*<sup>-/-</sup>)  
522 macrophages infected with MRSA for 4h. Images were processed using similar criteria  
523 as in panel A.

524 (D) Quantification of Tom20 positive smaller objects (surface area < 0.4 μm<sup>2</sup>) from WT  
525 and Parkin deficient macrophages infected with MRSA. Confocal microscopy images  
526 processed as in panel B and presented as mean +/- SEM from at least 135 cells pooled  
527 from three independent experiments.

528 (E) Flow cytometry mean fluorescence intensity (MFI) of WT and Parkin deficient  
529 macrophages when pulsed with MitoPY1 for 1h and infected with MRSA for 4h. Data  
530 represented as geometric mean of n≥3 independent experiments +/- SD.

531 (F) Representative live fluorescence wide-field microscopy images of WT and Parkin  
532 deficient macrophages pulsed with MitoPY1 (green) for 1h and infected with MRSA-  
533 mCherry (red). Images were acquired at 4h pi and processed by MetaMorph software.

534 (G) Ratiometric measurement of MitoPY1 fluorescent intensity of phagosome relative to  
535 total cellular fluorescent intensity (MFI-phagosome/MFI-cell). Phagosomes were defined  
536 by the area of the cell where the red fluorescent MRSA-mCherry are located.

537 (H) Percent of MRSA intracellular killing by WT and Parkin deficient macrophages was  
538 quantified by the following formula  $[1 - (\text{CFU}_{\text{indicated time points}} / \text{CFU}_{1\text{h pi}})] \times 100$ , which  
539 represent the percent difference in CFU obtained at indicated time point relative to 1h  
540 pi. Data are presented as mean of n≥3 independent experiments +/- SD.

541 (I) Percent of MRSA intracellular killing by RAW264.7 macrophages when treated with  
542 control DMSO or Dynamin-related protein 1 (Drp1) selective inhibitor (Mdivi-1, 25 μM).

543 pValue: \* < 0.05, \*\*< 0.01, \*\*\*< 0.001 and \*\*\*\*< 0.0001.

544

545 **Figure 4. Parkin is essential for immunity during MRSA subcutaneous infection**

546 (A) Bacterial burden in skin abscesses from male and female wild-type (WT) and Parkin  
547 deficient C57BL/6 mice (*Parkin*<sup>-/-</sup>) infected subcutaneously with 10<sup>7</sup> CFU of MRSA for 3  
548 days. Horizontal lines represent the mean. Data are pooled from two independent  
549 experiments.

550 (B-C) KC or IL1 $\beta$  cytokine levels in skin abscess homogenate of WT and *Parkin*<sup>-/-</sup> mice.  
551 Cytokine levels were quantified by ELISA. Graph bars represent mean of n=13 WT and  
552 12 *Parkin*<sup>-/-</sup> mice pooled from 2 independent experiments. Error bars represent standard  
553 error of the mean (SEM).

554 pValue: \* < 0.05, \*\* < 0.01 and \*\*\*\* < 0.0001.

555

556 **Figure 5. Blocked of phagolysosome fusion enhances MDV mediated mH<sub>2</sub>O<sub>2</sub>**  
557 **killing**

558 (A) Processed confocal microscopy representative images of RAW264.7 macrophages  
559 infected with MRSA-mCherry (red) for 4h and stained for Tom20 (green). Images were  
560 acquired by Leica TCS SP8 confocal scanning microscope and deconvoluted using  
561 Huygens essential software. Images were processed using the following setting;  
562 Threshold: 10%, Seed: 10% and Garbage: 50. Tom20 positive large objects (surface  
563 area > 0.4  $\mu\text{m}^2$ ) were subtracted from the original images to define Tom20 positive  
564 small objects.

565 (B) Quantification of Tom20 positive small objects (MDVs) per macrophage during  
566 MRSA-mCherry infection in the presence and absence of Bafilomycin A1. See detail in  
567 figure 3A. Data are presented as mean of at least 110 phagosomes from each condition  
568 pooled from three independent experiments +/- SEM.

569 (C) Representative live wide-field microscopy images of RAW264.7 macrophages  
570 pulsed with MitoPY1 (green) and chased 4h post MRSA-mCherry (red) infection in the  
571 presence of Bafilomycin A1 (Baf A1, 100 nM) or controlled solvent (DMSO).

572 (D) Mean fluorescent intensity (MFI) of MRSA-containing phagosomes when  
573 macrophages were being pulsed with MitoPY1 (green) and chased 4h post MRSA-  
574 mCherry (red) in the presence and absence of Bafilomycin A1 (Baf A1, 100 nM). Data  
575 represent mean of at least 321 phagosomes of each condition pooled from three  
576 independent experiments +/- SEM.

577 (E) Percent of MRSA intracellular killing by RAW264.7 macrophages treated with  
578 Bafilomycin A1 (Baf A1, 100 nM) or control solvent (DMSO). Percent killing was  
579 quantified by the following formula  $[1 - (\text{CFU}_{\text{indicated time points}} / \text{CFU}_{1\text{h pi}})] \times 100$ , which  
580 represent the percent difference in CFU obtained at indicated time point relative to 1h  
581 pi. Graph bars represent mean of  $n \geq 3$  independent experiments +/- SD.

582 (F) Transmission electron microscope images of macrophage MRSA-containing  
583 phagosomes. Macrophages are infected with MRSA for 4h in the presence and  
584 absence of Bafilomycin A1 (Baf A1, 100 nM). Images were acquired by using JEOL  
585 JEM-1400 Plus transmission electron microscope. Arrows indicate vesicles that are  
586 localized inside the phagosomes.



587 pValue: \*\* < 0.01 and \*\*\*\* < 0.0001.

588

589 **Figure 6. Sod2 is the mitochondria payload delivered to phagosome to promote**  
590 **mH<sub>2</sub>O<sub>2</sub> killing**

591 (A) Representative confocal microscopy images of RAW264.7 macrophages infected  
592 with MRSA (blue) or stimulated with bead (blue) for 4h and stained for Lamp1 (red) and  
593 Sod2 (green). Images were acquired using Leica TCS SP8 confocal scanning  
594 microscope and deconvoluted using Huygens essential software.

595 (B) Confocal microscopy images of a magnified area of macrophages where bead or  
596 MRSA-containing phagosome is localized. Images in the right panel are the resulted  
597 images after subtracting large Sod2 positive objects (surface area > 0.4  $\mu\text{m}^2$ ) from left  
598 panel images.

599 (C) Quantification of Sod2 positive small objects (surface area < 0.4  $\mu\text{m}^2$ ) of 2  $\mu\text{m}^2$  area  
600 of the cell where beads or MRSA are localized. Large Sod2 positive objects were  
601 filtered out of the deconvoluted images and the number of remained Sod2 positive  
602 objects were enumerated per 2  $\mu\text{m}^2$  areas of the cell where phagsosomes were  
603 localized. Data represent mean of at least 60 phagosomes from three independent  
604 experiments.

605 (D) Immunoblots of cell lysate from RAW264.7 macrophages stably transduced with  
606 lentivirus-encoded shRNA for non-target (NT-Control) or Sod2 (Sod2 KD), probed with  
607 an anti-Sod2 antibody or anti-Actin antibody as a loading control.

608 (E) Mean fluorescent intensity (MFI) of shRNA stably knockdown Sod2 (Sod2 KD) or  
609 non-target (NT-Control) macrophages after pulsed with MitoPY1 and chased 4h post  
610 MRSA infection. Samples were acquired by flow cytometry and analyzed by FlowJo  
611 software. MFI represent geometric mean of of  $n \geq 3$  independent experiments +/- SD.

612 (F) Intracellular MRSA killing by Sod2 knockdown (Sod2 KD) and non-target (NT-  
613 Control) macrophages was quantified by using the following formula [ $1 - (\text{CFU}_{\text{indicated time}}$   
614  $\text{points} / \text{CFU}_{1\text{h pi}})$ ] and expressed as percentage. Graph bars represent mean of percent  
615 killing of  $n \geq 3$  independent experiments +/- SD.

616 pValue: \* < 0.05, \*\*\* < 0.001 and \*\*\*\* < 0.0001.

617

## 618 **STAR Methods**

619

## 620 **CONTACT FOR REAGENT AND RESOURCE SHARING**

621 Reagents and resources can be obtained by directing requests to the Lead Contact,  
622 Mary O’Riordan ([oriordan@umich.edu](mailto:oriordan@umich.edu))

623

## 624 **EXPERIMENTAL MODEL AND SUBJECT DETAILS**

625

### 626 **Mice**

627 Wild-type C57BL/6 and *Park2*<sup>-/-</sup> are purchased from the Jackson Laboratory. *Tlr2/4/9*<sup>-/-</sup>  
628 have been described previously (Abuaita et al. 2015). All mice were maintained  
629 according to an approved protocol in the Unit for Laboratory Animal Medicine (ULAM)  
630 facilities at the University of Michigan Medical School.

631

## 632 **Cells**

633 Primary bone marrow derived macrophages (BMDMs) were prepared by flushing  
634 mouse femurs in DMEM supplemented with 100 units/ml of Pen/Strep. Cells were  
635 differentiated by incubation in BMDM medium (50% DMEM, 2 mM L-glutamine, 1 mM  
636 sodium pyruvate, 30% L929-conditioned medium, 20% heat-inactivated fetal bovine  
637 serum (FBS), 55  $\mu$ M 2-mercaptoethanol, and Pen/Strep). L-929 and HEK 293T cells  
638 were cultured in MEM supplemented with 2 mM L-glutamine, 1 mM sodium pyruvate,  
639 1mM Non-essential amino acid (NEAA), 10 mM HEPES, and 10% heat-inactivated  
640 FBS). RAW 264.7 cells were cultured in RPMI 1640 containing 2 mM L-glutamine and  
641 10% heat-inactivated FBS. All cells were incubated at 37°C in 5% CO<sub>2</sub>.

642

## 643 **Bacterial infections**

644 USA300 LAC, a community associated methicillin-resistant *Staphylococcus aureus*  
645 strain (MRSA) and its isogenic strain harboring pSarA-mCherry plasmid (MRSA-  
646 mCherry) (Boles and Horswill, 2008), were maintained at -80°C in LB medium  
647 containing 20% glycerol. All strains were cultured in tryptic soy agar (TSA, Becton  
648 Dickinson), and selected colonies were grown overnight at 37°C with shaking (240 rpm)  
649 in liquid tryptic soy broth. Bacteria were pelleted, washed and re-suspended in PBS.  
650 The bacterial inoculum was estimated based on OD<sub>600</sub>, and verified by plating serial  
651 dilutions on TSA plates to determine colony forming units (CFU). Macrophages were  
652 infected at a multiplicity of infection (MOI) of 20 in culture medium without antibiotic for  
653 45 minutes. Infected macrophages were washed three times with PBS and incubated in

654 medium containing 100 µg/ml of gentamicin to kill extracellular bacteria for 15 minutes.  
655 Media was exchanged with media containing 50 µg/ml of gentamicin for the remaining  
656 time of the experiments.

657

## 658 **METHOD DETAILS**

659

### 660 **Macrophage bactericidal activity**

661 Macrophages were seeded in a 24-well tissue culture treated plate at a density of 1.5 X  
662 10<sup>5</sup> cell/well. The next day, macrophages were infected with MRSA (MOI of 20). The  
663 number of intracellular bacteria was determined by washing infected macrophages with  
664 PBS, lysing with 0.1% NP-40, and enumerating bacterial CFUs via serial dilution on  
665 agar plates. The percentage of killed MRSA was calculated by the following formula [1 -  
666 (CFU<sub>indicated time points</sub> / CFU<sub>1h pi</sub>)] X 100, which represents the percent difference between  
667 CFU at indicated time points relative to 1h pi. Where indicated, macrophages were pre-  
668 incubated with NecroX-5 (10 µM), Bafilomycin A1 (100 nM) or Mdivi-1 (25 µM) for 30  
669 minutes before infection, and all inhibitors were maintained throughout the experiment.

670

### 671 **Mouse infection**

672 Subcutaneous MRSA infection was performed as previously described (Tseng et al.,  
673 2011). Male and Female C57BL/6 mice and *Park2*<sup>-/-</sup> were shaved on the right flank.  
674 Mice were inoculated with 10<sup>7</sup> bacteria in 100 µl of PBS subcutaneously on the shaved  
675 area of the skin using a 27 gauge needle. Mice were sacrificed on day 3 post-infection  
676 and skin abscesses were excised, weighed and homogenized in PBS. Total CFU per

677 mouse abscess were enumerated by serial dilution and plating on TSA agar. Total CFU  
678 was converted to CFU/mg of tissue weight. Cytokines were quantified by ELISA at the  
679 University of Michigan ELISA core and converted to pg/mg of tissue weight.

680

### 681 **Cellular mROS measurement**

682 Macrophages were plated in 60 mm non-treated dishes and treated with 10  $\mu$ M MitoPY1  
683 (TOCRIS) or 10  $\mu$ M MitoSOX (Life Technology) for 1 hour. Macrophages were washed  
684 three times with media and only when indicated, macrophages were treated for 30  
685 minutes with NecroX-5 (10  $\mu$ M) or control solvent prior to infection with MRSA (MOI of  
686 20). For positive controls, macrophages were treated with 100  $\mu$ M hydrogen peroxide  
687 or 10  $\mu$ M Antimycin A for 1 hour to induce the oxidation of MitoPY1 or MitoSOX,  
688 respectively. Macrophages were subjected to flow cytometry and data were analyzed  
689 with FlowJo software. The mean fluorescence intensity for each condition was  
690 determined as the geometric mean.

691

### 692 **Phagosomal mROS measurement**

693 Macrophages were plated in 35 mm glass bottom dishes (MatTek). The next day,  
694 macrophages were treated with MitoPY1 (10  $\mu$ M) for 1 hour, washed three times with  
695 media and stimulated with inert red fluorescent beads or infected with live or dead  
696 (inactivated by paraformaldehyde) red fluorescent MRSA harboring pSarA-mCherry  
697 (MOI of 20). Macrophages were imaged in Ringer buffer (155 mM NaCl, 5 mM KCl, 1  
698 mM MgCl<sub>2</sub>.6H<sub>2</sub>O, 2 mM NaH<sub>2</sub>PO<sub>4</sub>.H<sub>2</sub>O, 10 mM HEPES, and 10 mM Glucose) with an  
699 Olympus IX70 inverted live-cell fluorescence microscope. Fluorescence images were

700 further processed by MetaMorph imaging software. For quantification of mROS  
701 association with phagosomes, the mean fluorescence intensity of MitoPY1 at the  
702 phagosome area was measured by ImageJ. Phagosomal regions in the cell images  
703 were defined by the location of red fluorescent beads or bacteria. For BMDM  
704 experiments, a ratiometric mean fluorescence intensity of the phagosomal area over the  
705 mean fluorescence intensity of the cell was calculated. This was done because Park2  
706 deficient macrophages have higher global MitoPY1 fluorescence intensity when  
707 compared to WT macrophages prior to infection.

708

### 709 **Confocal microscopy**

710 Macrophages were seeded onto microscope cover glass and infected with MRSA (MOI  
711 of 20) or stimulated with fluorescent beads. Cells were fixed at 4h pi with 3.7%  
712 paraformaldehyde at room temperature for 20 minutes and permeabilized with PBS  
713 contain 0.1% Triton X-100 for 15 minutes. MRSA were stained using chicken anti-  
714 protein A antibody conjugated to biotin (Abcam ab18598) in staining buffer (PBS, 0.1%  
715 Triton X-100, 5% BSA, and 10% normal goat serum). Host proteins were stained using  
716 mouse anti-Sod2 (Abcam ab110300, clone 9E2BD2), Rat-anti-Lamp1 (DSHB, clone  
717 1D4B), and anti-Tom20 (Santa cruz, FL145). Secondary antibodies (goat anti-mouse  
718 (Alexa-488), goat anti-Rat (Alexa-594) and Streptavidin (Alexa-405) were used  
719 according to manufacturer's procedure. Cover glasses were mounted on microscope  
720 slides using Prolong Diamond (Life Technology). Cells were imaged using a Leica TCS  
721 SP8 confocal microscope and deconvoluted using Huygens essential software by  
722 scientific volume imaging using the following criteria; Threshold (10%), Seed (10%) and

723 Garbage Volume (50). To define MDVs, large objects (surface area larger than  $0.4 \mu\text{m}^2$ )  
724 were filtered out from the mitochondrial fluorescence labeled channel and the number of  
725 remaining objects per cell were recorded.

726

## 727 **Transmission electron microscopy**

728 Macrophages were infected with MRSA (MOI of 20) in the presence of Bafilomycin A1  
729 (100 nM) or control DMSO. Infected macrophages were fixed at 4h pi with 2.5%  
730 glutaraldehyde for at least 1h at room temperature, then overnight at  $4^\circ\text{C}$ . For immuno-  
731 gold staining, infected macrophages were stained for Tom20 prior to fixation with  
732 glutaraldehyde according to manufacturer's procedure (AURION). Briefly, cells were  
733 fixed with 3.7% paraformaldehyde at room temperature for 20 minutes and  
734 permeabilized with Sorenson's buffer containing 0.1% Triton X-100 for 15 minutes. Cells  
735 were blocked with the AURION blocking solution (AURION-BSA-c) and stained using  
736 primary anti-Tom20 antibody (Santa Cruz, FL145) and secondary goat anti-rabbit ultra-  
737 small gold antibody (AURION). Silver stain enhancement was carried out by using the  
738 AURION R-GENT SE-EM according to reagent protocol (AURION). Glutaraldehyde  
739 fixed samples were washed with Sorenson's buffer 3-times before post-fixing in 2%  
740 osmium tetroxide in Sorenson's buffer for 1h at room temperature. Samples were  
741 washed again 3-times with Sorenson's buffer, then dehydrated through ascending  
742 concentrations of ethanol, treated with propylene oxide, and embedded in EMbed 812  
743 epoxy resin. Semi-thin sections were stained with toluidine blue for tissue identification.  
744 Selected regions of interest were ultra-thin sectioned to 70 nm and post stained with

745 uranyl acetate and Reynolds lead citrate. Sections were examined using a JEOL JEM-  
746 1400 Plus transmission electron microscope (TEM) at 80 kV.

747

#### 748 **Generation of RAW264.7 $\Delta$ *Ire1- $\alpha$* and RAW264.7 shRNA stable knockdown cells**

749 The generation of lentivirus for CRISPR-Cas9 knockout and shRNA knockdown was  
750 done by using HEK293T packaging cells, which were grown in DMEM with 10% FBS.

751 The virus particles were produced by transfecting the cells with the TRC shRNA  
752 encoded plasmid (pLKO.1) or guided RNA (gRNA) encoded plasmid (lentiCRISPRv2)

753 along with the packaging plasmids (pHCMV-G, and pHCMV-HIV-1) (Kulpa et al., 2013)

754 using FUGENE-HD transfection reagent (Promega). Media was changed after 24h and

755 virus particles were collected after 72h post-transfection. A total of 2 ml of medium

756 containing virus were concentrated ten-fold by ultracentrifugation at 24,000 rpm for 2h

757 at 4°C and used to transduce RAW264.7 cells. Transduced cells were selected with

758 puromycin (3  $\mu$ g/ml). The mouse *Sod2* specific shRNA plasmid with the sense

759 sequence of (GCTTACTACCTTCAGTATAAA) and the non-target control shRNA

760 plasmid were purchased from Sigma-Aldrich. The efficiency of knockdown was

761 monitored by immunoblot analysis using anti-*Sod2* antibody (Santa Cruz). Anti-Actin

762 antibody was used as a loading control (Fisher Scientific). The mouse *IRE1- $\alpha$*  specific

763 gRNA sequence of (CTTGTTGTTTGTCTCGACCC) and the non-target gRNA control

764 sequence of (TCCTGCGCGATGACCGTCCG) were cloned into lentiCRISPRv2

765 according to the Feng Zhang lab protocol (Sanjana et al., 2014). Single clones of

766 RAW264.7 $\Delta$ *Ire1- $\alpha$*  were isolated and confirmed by the absence of *IRE1- $\alpha$*  protein by

767 immunoblot using anti-*IRE1- $\alpha$*  antibody (clone 14C10, Cell Signaling). Anti-GAPDH



768 antibody was used as a loading control (Santa Cruz). RAW264.7  $\Delta Irf1-\alpha$  clone was also  
769 confirmed by absence of its endonuclease activity when cells were treated with  
770 endoplasmic reticulum stress inducer Thapsigargin (5  $\mu$ M) by *xbp1* splicing assay  
771 (Figure S1) as previously described (Abuaita et al., 2015).

772

### 773 **Cell death assay**

774 Cell death was measured by flow cytometry using SYTOX green dead cell stain  
775 according to manufacturer's protocol (Life Technology). Briefly, macrophages were  
776 incubated with SYTOX green dead cell stain (30 nM) in HBSS for 20 minutes at room  
777 temperature prior to flow cytometry analysis using 488 excitation and 530/30 emission.  
778 Digitonin (0.01%, Sigma Aldrich) was used as a positive control to permeabilize the  
779 plasma membrane. The percent of SYTOX positive cells was determined by gating  
780 against mock unstained cells.

781

### 782 **QUANTIFICATION AND STATISTICAL ANALYSIS**

783 Data were analyzed using Excel 2016 and Student's unpaired two-tailed t-test was  
784 applied. The mean of at least three independent experiments was presented with error  
785 bars showing standard deviation (SD) or standard error of the mean (SEM), which is  
786 indicated in figure legends. *P* values of less than 0.05 were considered significant and  
787 designated by: \**P* < 0.05, \*\**P* < 0.01, \*\*\**P* < 0.001 and \*\*\*\**P* < 0.0001. All statistically  
788 significant comparisons within experimental groups are marked.

789

### 790 **DATA AND SOFTWARE AVAILABILITY**

791 RAW data are available upon request, which should be directed to the Lead Contact.

792 There was no proprietary software used in this study.

793

## 794 **ADDITIONAL RESOURCES**

795 mCherry-Mito-7 plasmid was used under material transfer agreement (MTA).

796

## 797 **Supplemental Information**

798

### 799 **Figure S1. IRE1 $\alpha$ endonuclease activity is absent in RAW264.7 $\Delta$ IRE1 $\alpha$** 800 **macrophage cell line in response to ER Stressor, Thapsigargin**

801 RT-PCR analysis of *Xbp1* mRNA splicing in single clone of RAW 264.7 macrophages  
802 stably transduced with IRE1 $\alpha$  specific guided RNA (gRNA) or non-target (NT-control).  
803 Macrophages were treated with 5  $\mu$ M thapsigargin (TG) to induce IRE1 $\alpha$  endonuclease  
804 activity or control DMSO. RT-PCR products were digested with *PstI* endonuclease.  
805 Because unspliced *Xbp1* mRNA contains a *PstI* site within the 26 spliced region, the  
806 digested RT-PCR products yield two smaller fragments representing the unspliced (U)  
807 *Xbp1* and one larger fragment representing the spliced (S) *Xbp1*. RT-PCR image is  
808 representative of  $n \geq 3$  independent experiments.

809

### 810 **Figure S2. TLR2/4/9 signaling is dispensable for MRSA-induced mH<sub>2</sub>O<sub>2</sub> but is** 811 **essential for macrophage bactericidal activity**

812 (A) Mean fluorescent intensity (MFI) of wild-type (WT) and *Tlr2/4/9* triple knockout  
813 (TLR2/4/9 KO) macrophages that were loaded with MitoPY1 and infected with MRSA.  
814 Macrophages were subjected to flow cytometry at 4h pi and collected data were  
815 analyzed by FlowJo software for geometric mean.

816 (B) Percent of MRSA intracellular killing by WT and TLR2/4/9 KO macrophages.  
817 Macrophage killing efficiency was calculated by using the following formula  $[1 - (\text{CFU}$   
818  $\text{indicated time points} / \text{CFU}_{1\text{h pi}})] \times 100$ , which represent the percent difference in CFU obtained  
819 at indicated time point relative to 1h pi. Data are expressed as percentage.

820 Graph bars represent mean of of  $n \geq 3$  independent experiments +/- SD. pValue: \*\* <  
821 0.01 and \*\*\*\* < 0.0001.

822

823 **Figure S3. Tom20 positive MDVs are defined by small objects that are stained**  
824 **with Tom20**

825 (A) Representative confocal images of MRSA infected and beads internalized  
826 macrophages that stained for Tom20. Images were acquired by Leica TCS SP8  
827 confocal scanning microscope and deconvoluted using Huygens essential software.  
828 Images were processed using the following setting; threshold: 10%, Seed: 10% and  
829 Garbage: 50. Right panel, Tom20 positive large objects (surface area > 0.4  $\mu\text{m}^2$ ) were  
830 subtracted from left panel Images.

831 (B) Quantification the number of Tom20 positive objects per beads internalized or  
832 MRSA infected macrophage that fall into indicated range of surface size bins.

833 Discontinuous line was drawn to point out the surface area size bin smaller than 0.4  
834  $\mu\text{m}^2$ , which was chosen to quantify Tom20 small objects (MDVs).

835

836 **Figure S4. Tom20 positive vesicles are localized in the lumen of MRSA**  
837 **phagosomes**

838 Transmission electron microscopy representative images of MRSA infected  
839 macrophages when treated with Bafilomycin A1 (Baf A1, 100 nM) or control DMSO.  
840 Tom20 was stained with immune-gold particles followed by silver enhancement. Left  
841 panel; images showing whole cell, middle panel; magnified images showing  
842 mitochondria, right panel; images showing MRSA phagosome. Arrows were drawn to  
843 indicate Tom20 positive gold particles present in MRSA phagosome lumen.

844

845 **Figure S5. Macrophage Sod2 is localized with Tom20**

846 Representative confocal microscopy images of RAW264.7 macrophages were stained  
847 with Sod2 and Tom20. Images were acquired with Leica TCS SP8 confocal scanning  
848 microscope and deconvoluted using Huygens essential software. Pearson Correlation  
849 Coefficient (PCC) was determined on the deconvoluted images using Huygens essential  
850 software and presented as mean of at least 230 cells +/- SD pooled from three different  
851 experiments.

852

853 **Figure S6. Knockdown macrophage Sod2 increases mitochondria superoxide**  
854 **production without interfering with host cell death during MRSA infection**

855 (A) Representative histogram plots are shown when macrophages were pulsed with  
856 MitoSOX for 1h and chased 4h after stimulated with Antamycin A (10  $\mu$ M), infected with  
857 MRSA at MOI of 20 or left untreated (Mock). Percent of MitoSOX positive cells was  
858 determined by gating against unstained cells. Percent of MitoSOX high cells was  
859 determined by gating against the MitoSOX first peak.

860 (B) Quantification of the percentage MitoSOX high from panel A. Data represent the  
861 percentage of cells with MitoSOX high relative to total MitoSOX positive cells.

862 (C) Percent of live macrophages was determined by Sytox green dead cell staining. NT-  
863 control and Sod2 KD macrophages were infected with MRSA for 4h (MOI of 20), treated  
864 with 0.01% Digitonin (Digitonin) to induce cell death or left untreated (Mock). Cells were  
865 stained with 30 nM of Sytox green in HBSS buffer and subjected to flow cytometry. Data  
866 are analyzed by FlowJo software. Percent of Sytox green positive cells were determined  
867 by gating against live cell peak.

868 Graph bars represent mean of  $n \geq 3$  independent experiments  $\pm$  SD. pValue: \* < 0.05  
869 and \*\* < 0.01.

870

871 **Movie S1. mH<sub>2</sub>O<sub>2</sub> accumulates in MRSA-containing phagosome**

872 Time-lapse movie of RAW264.7 macrophage after being pulsed with mitochondria-  
873 targeted H<sub>2</sub>O<sub>2</sub> fluorescent sensor, MitoPY1 (green fluorescent) for 1h and infected with  
874 MRSA-mCherry (Red fluorescent). Images were acquired using inverted IX-70 Olympus

875 live fluorescent microscope and analyzed using MetaMorph imaging software. Time  
876 clock Minutes : Seconds.

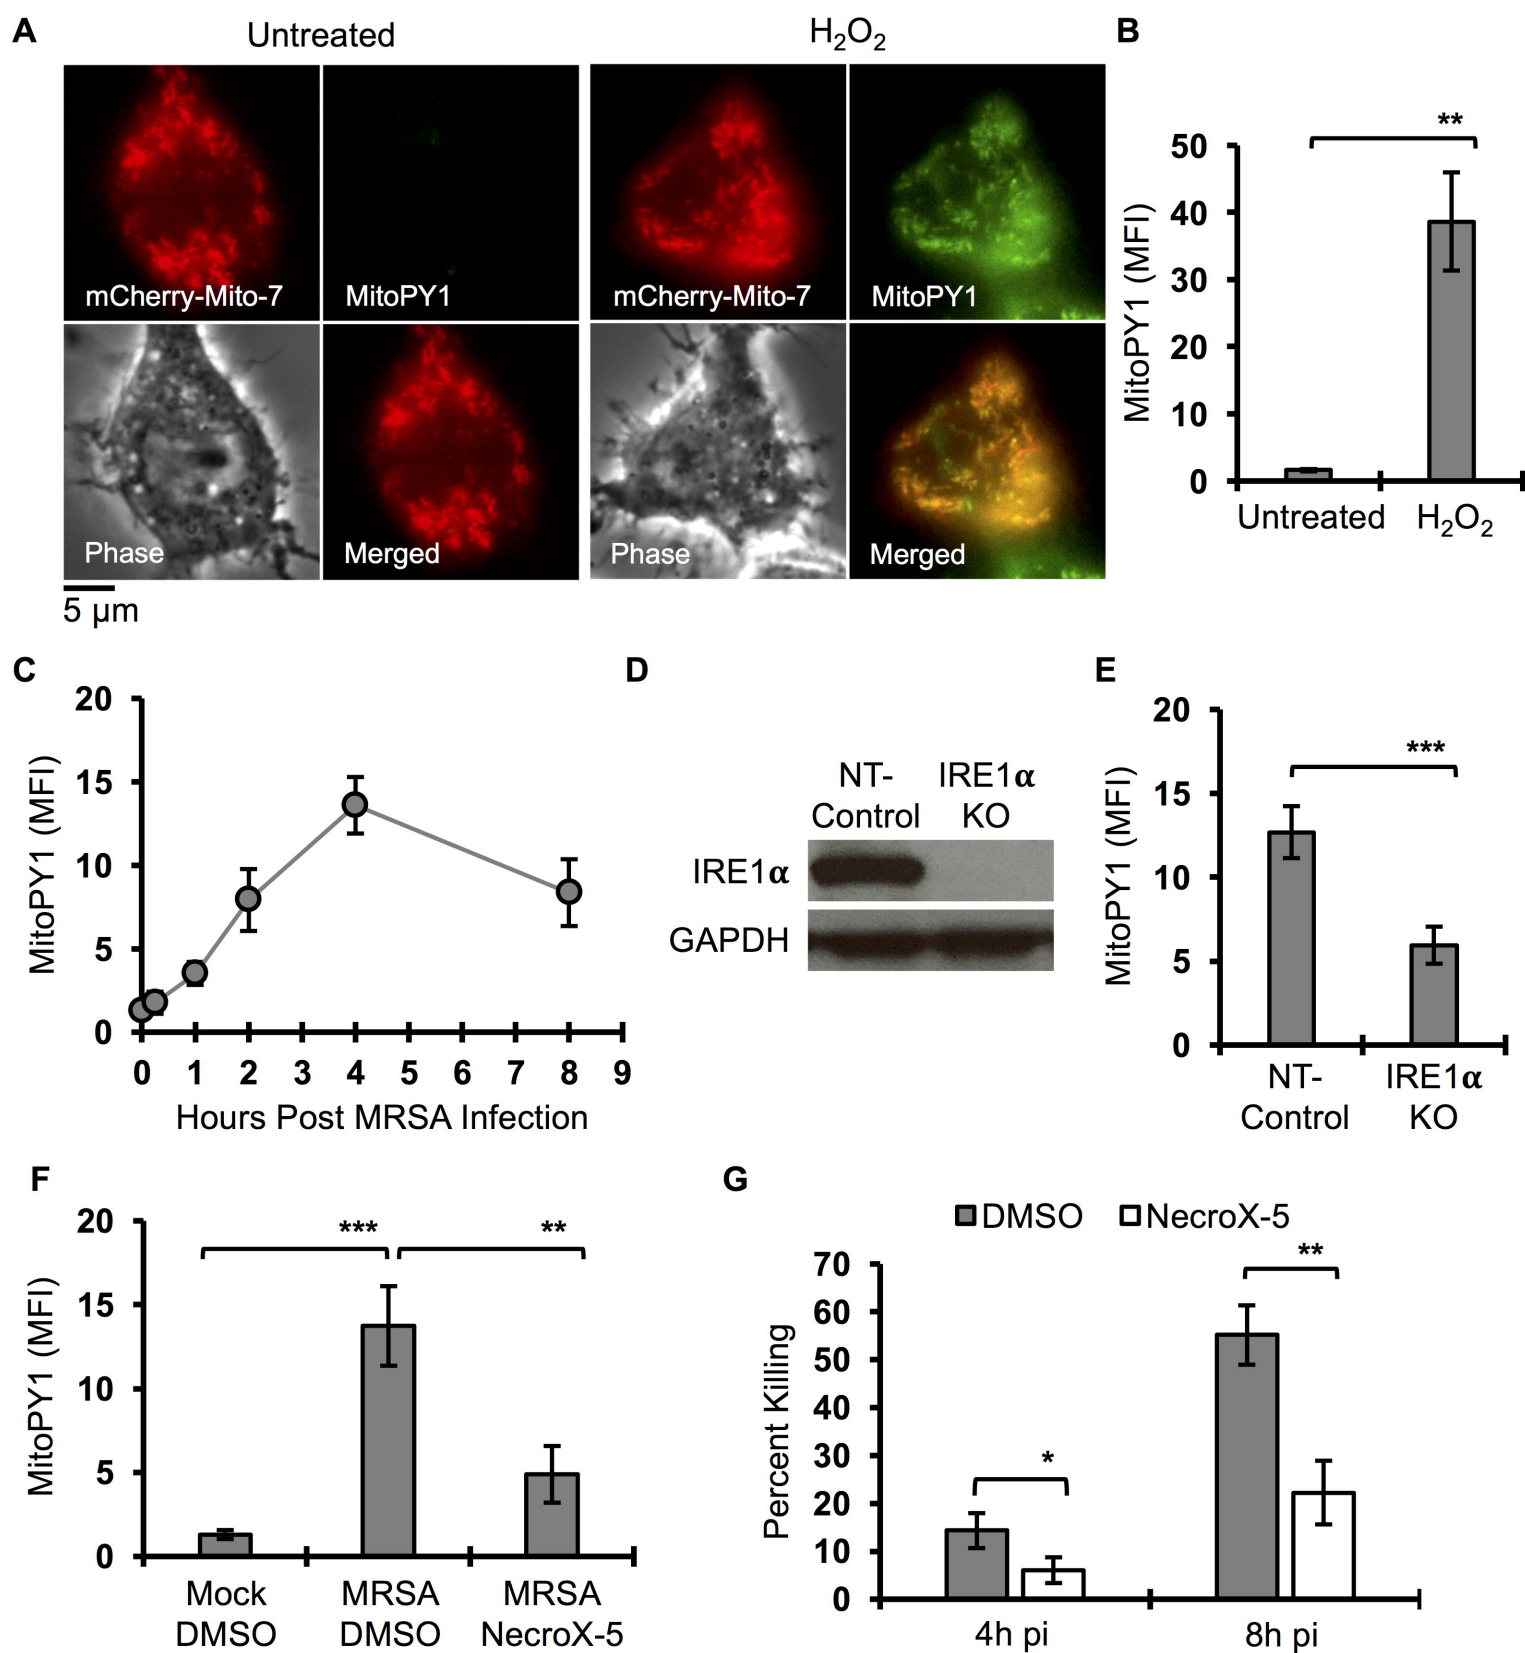

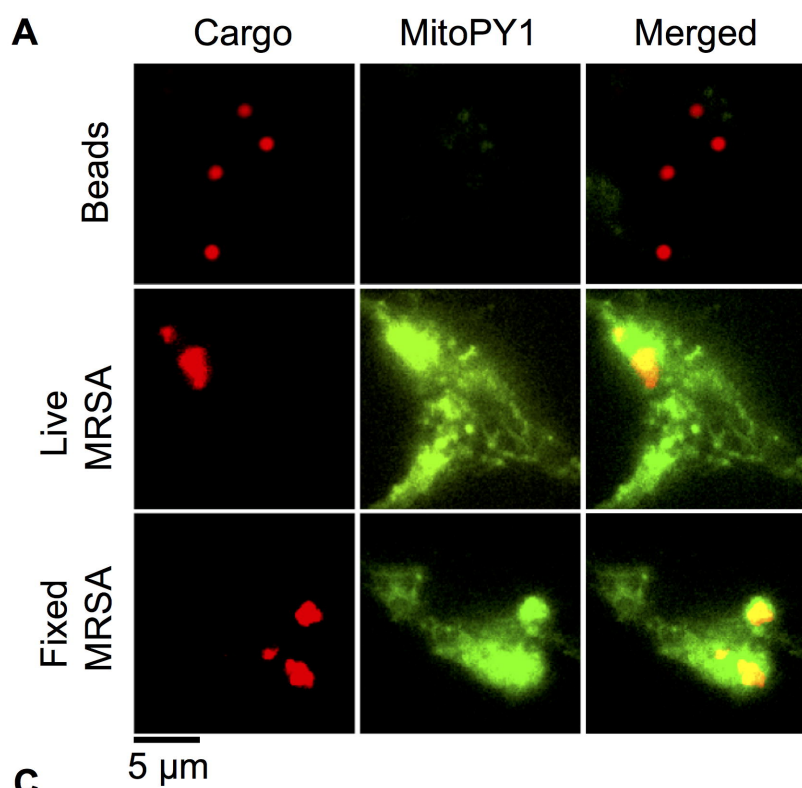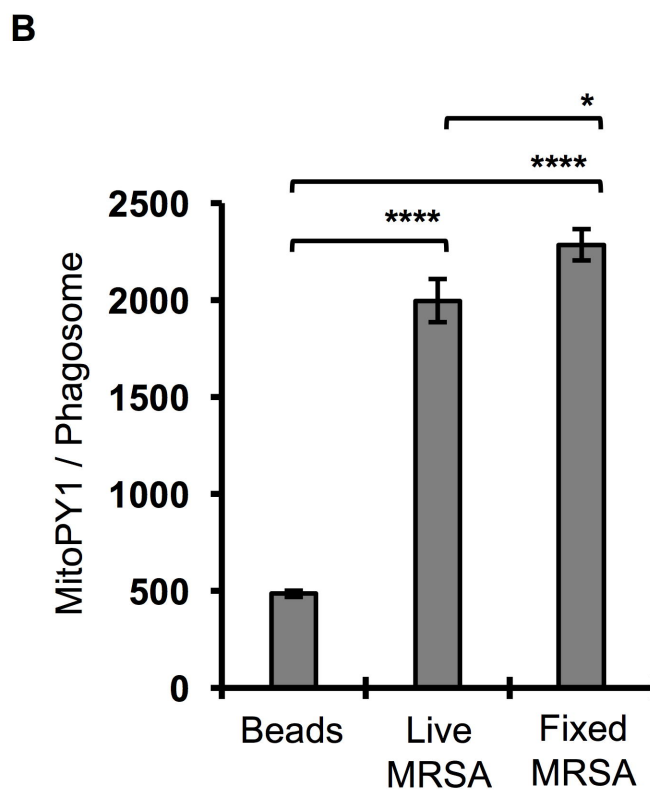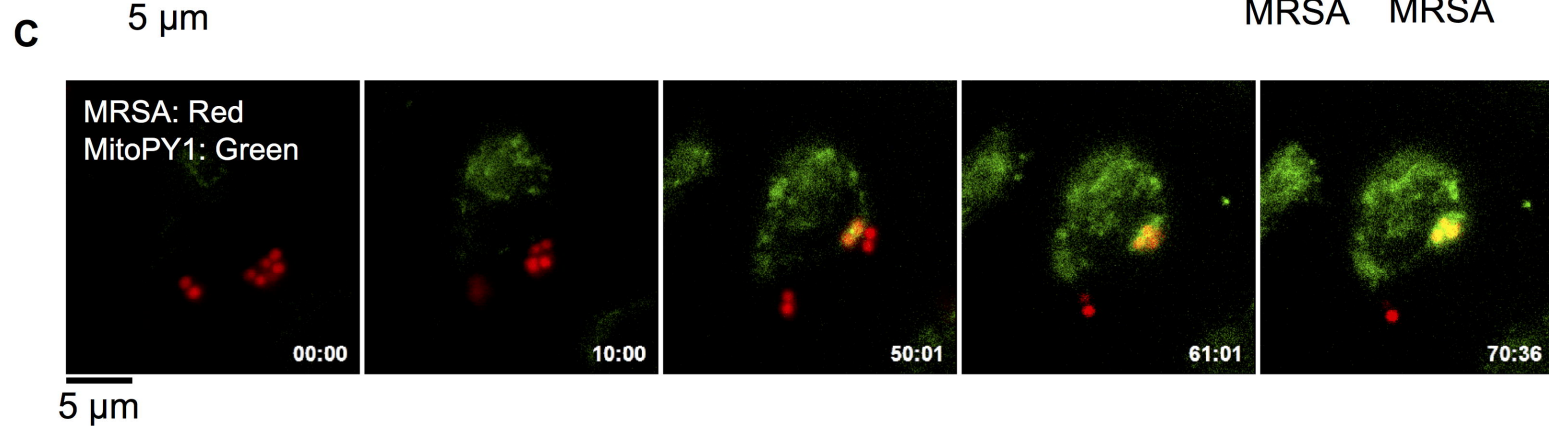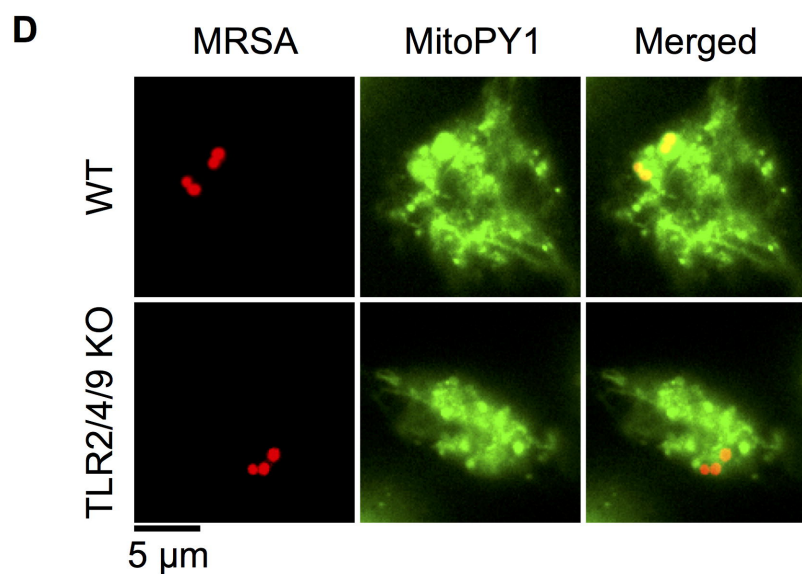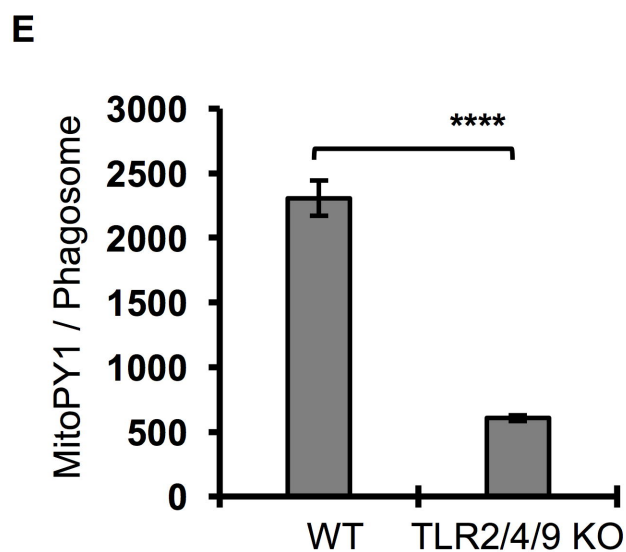



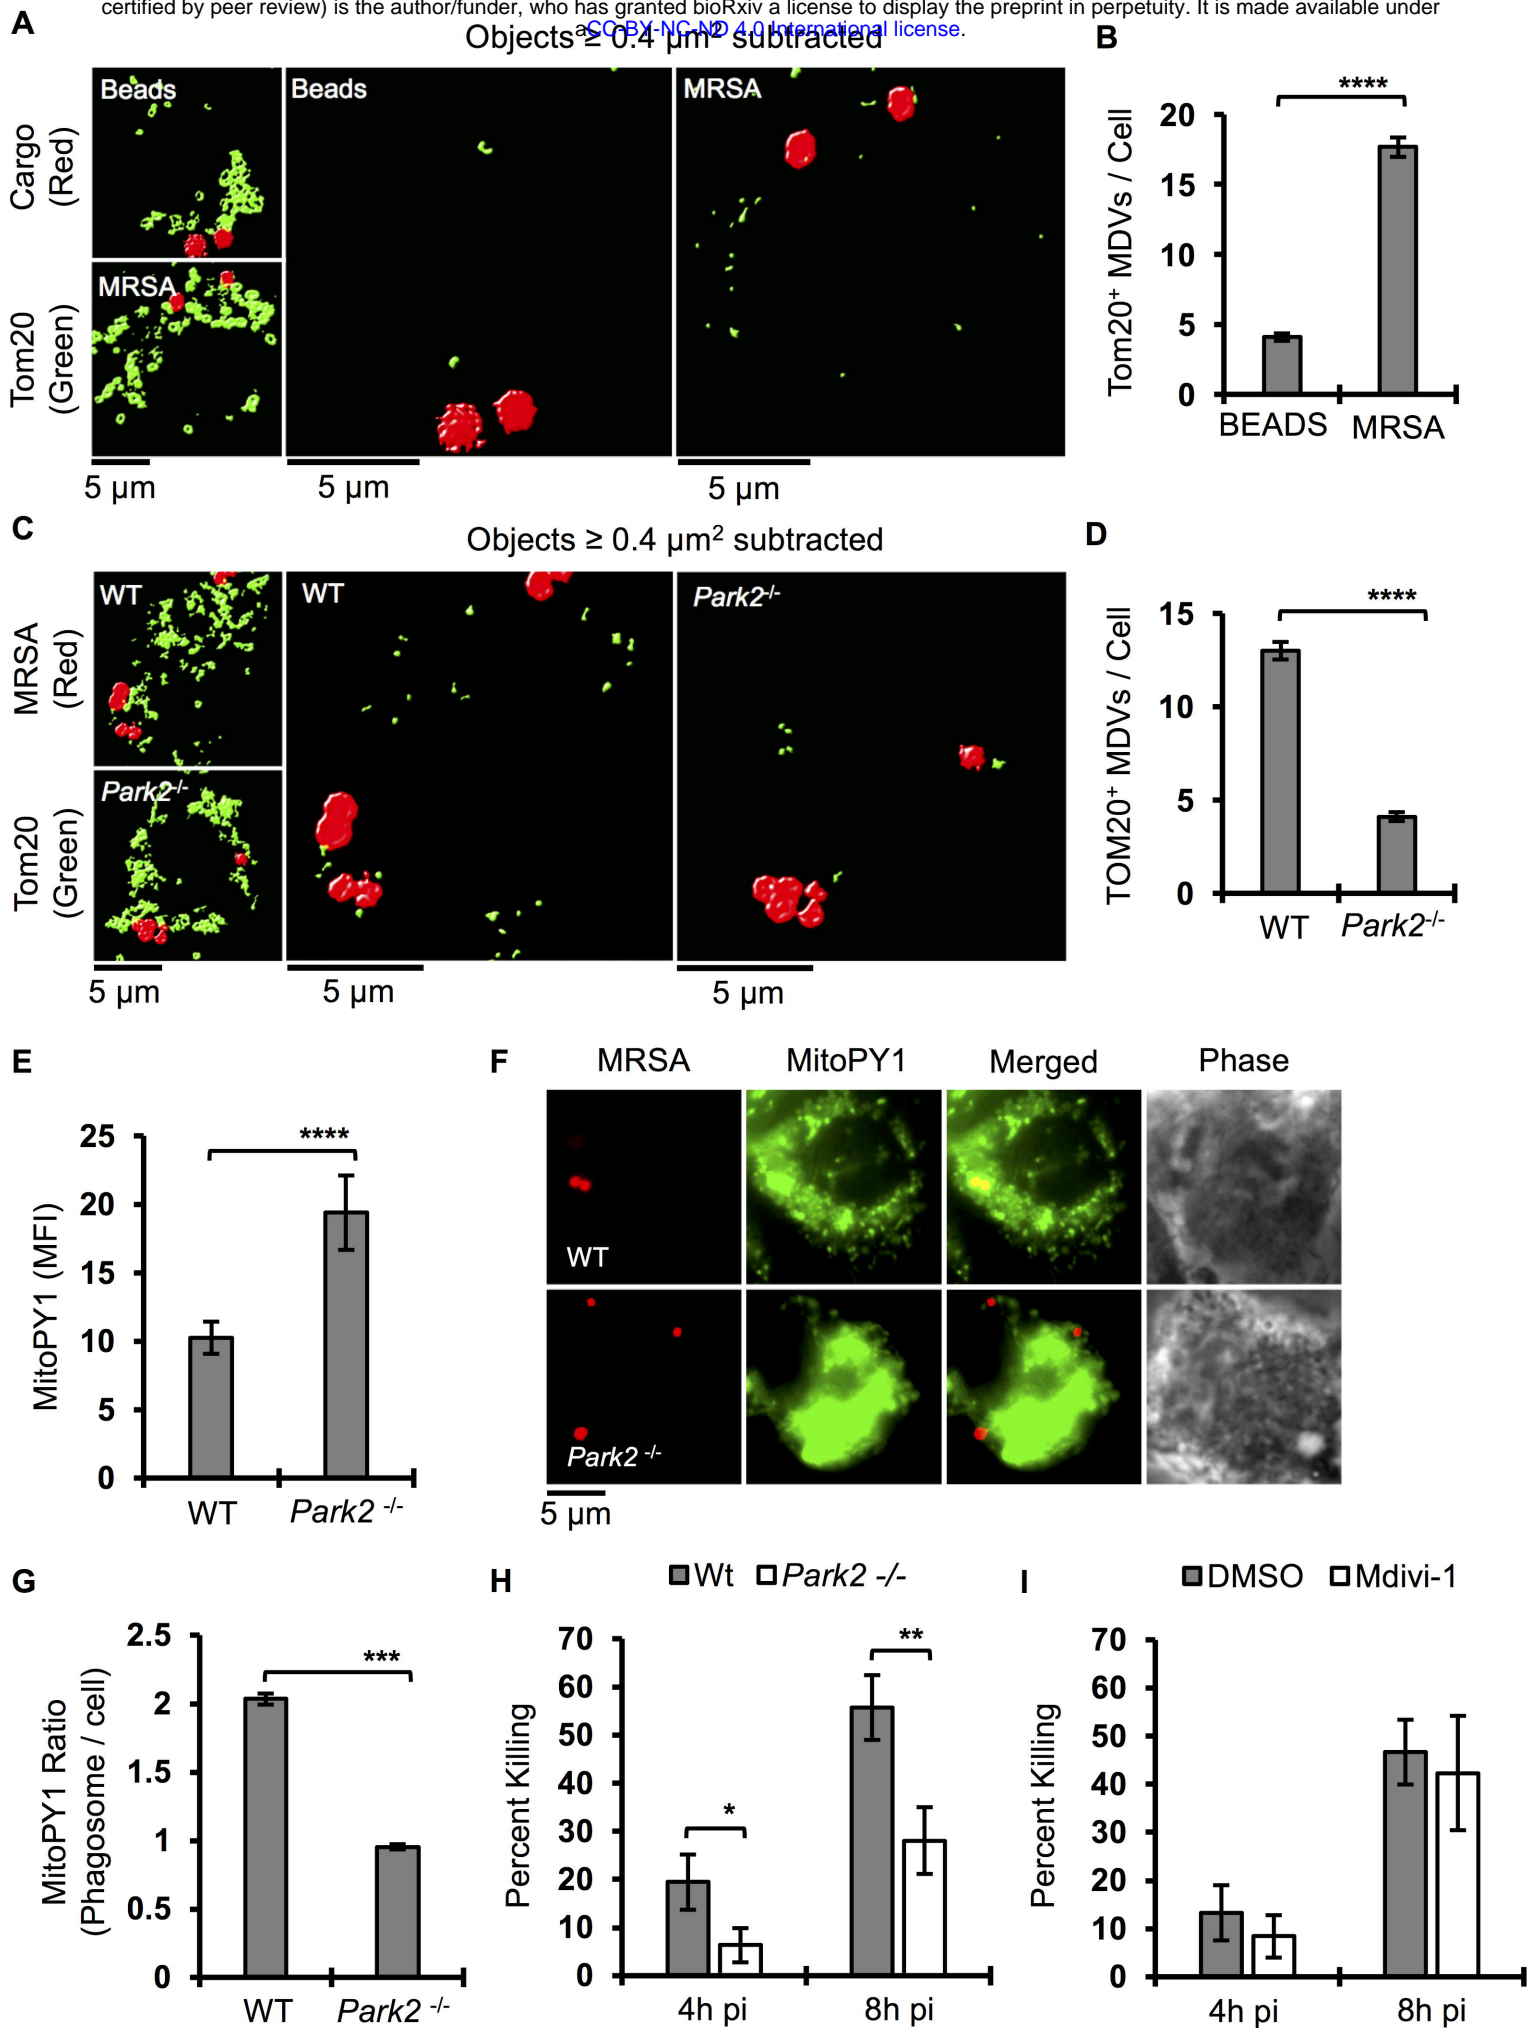

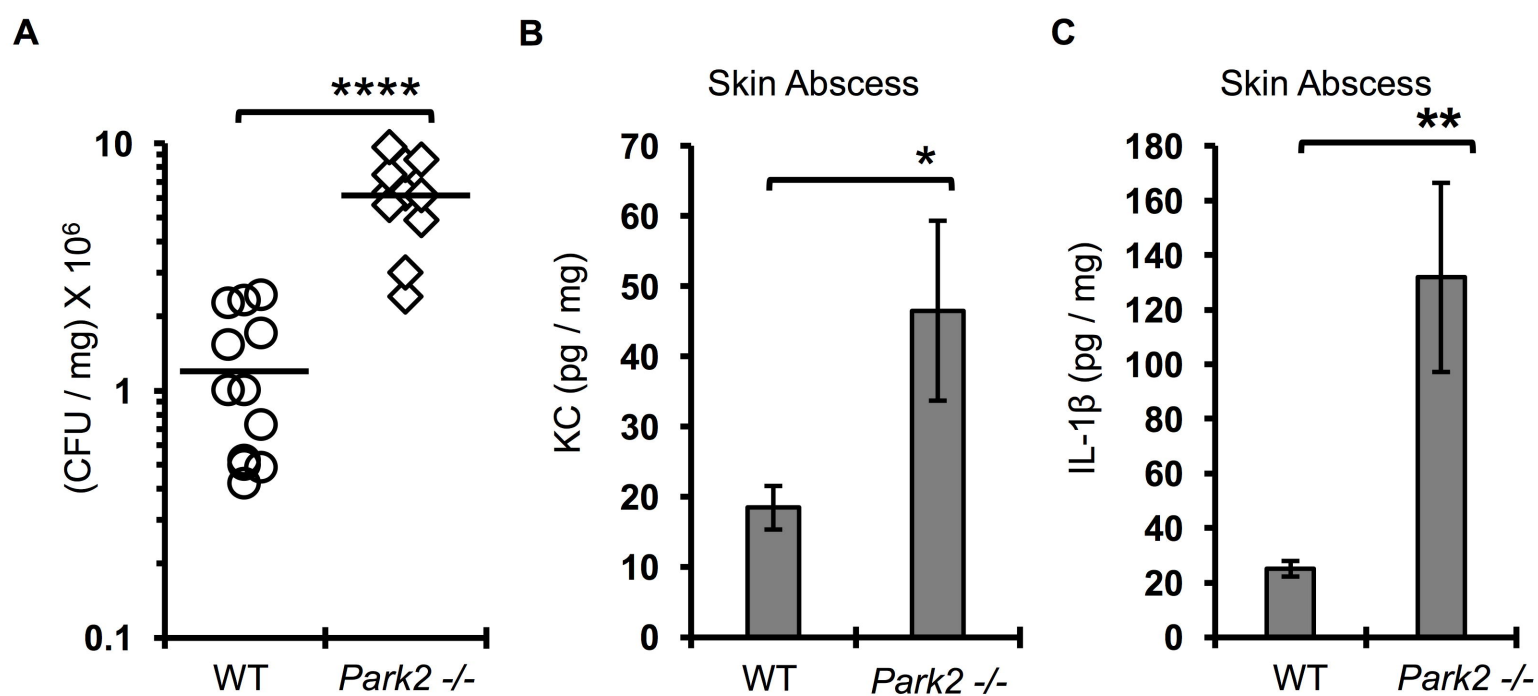

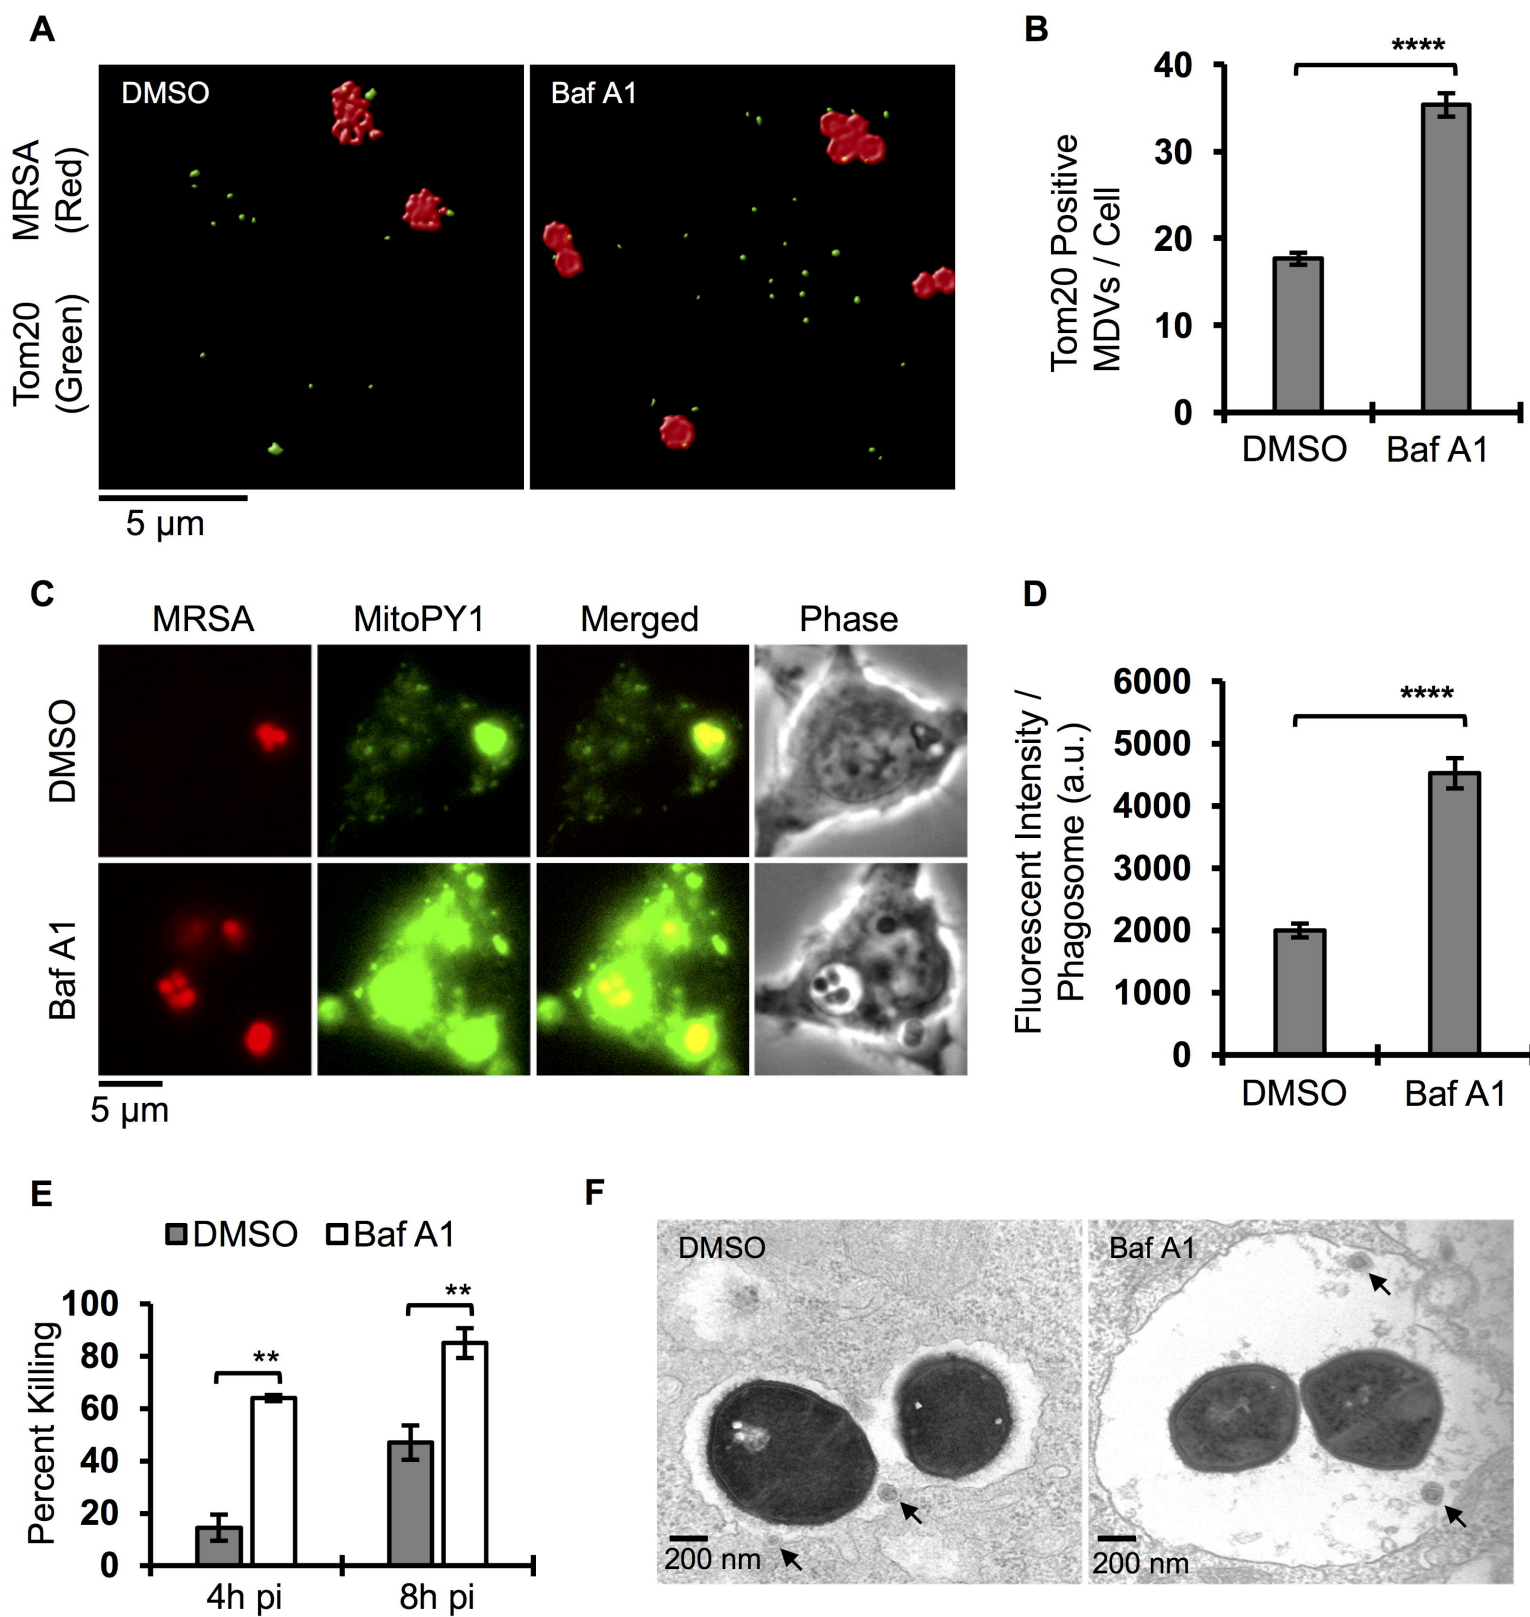

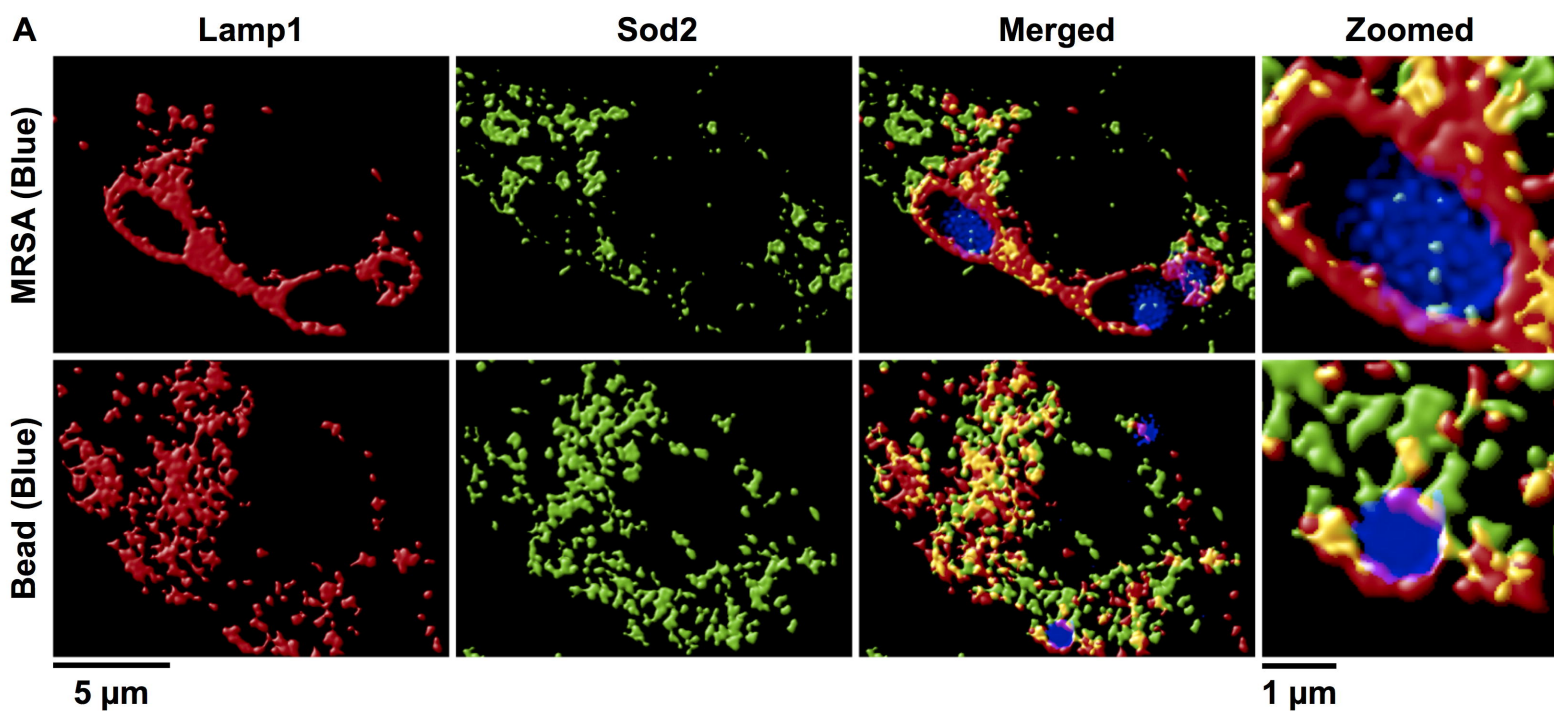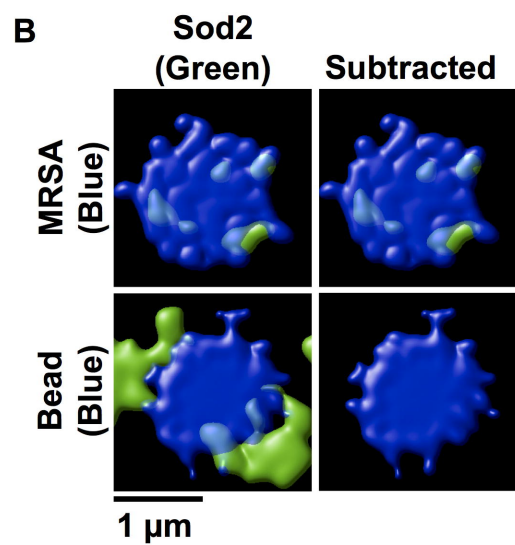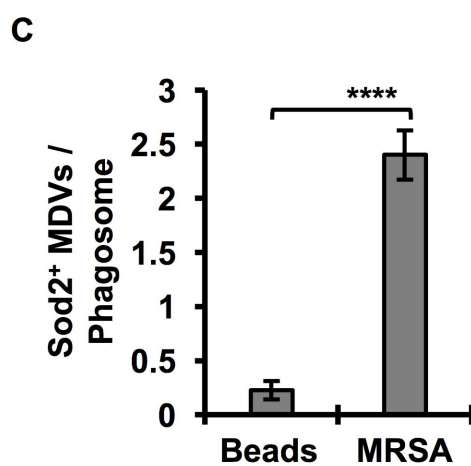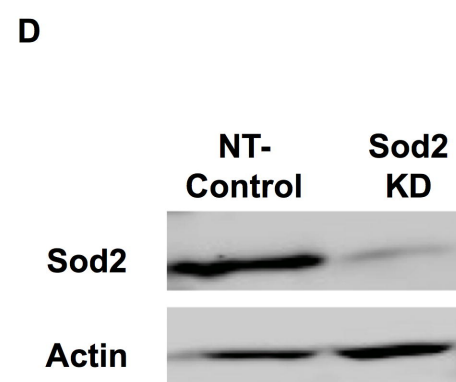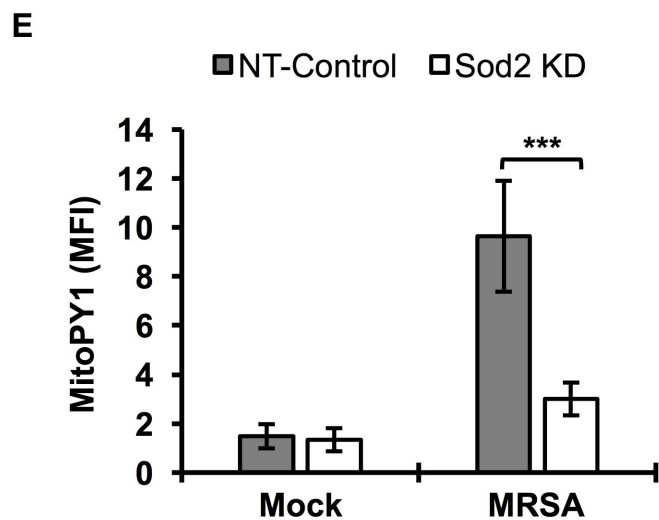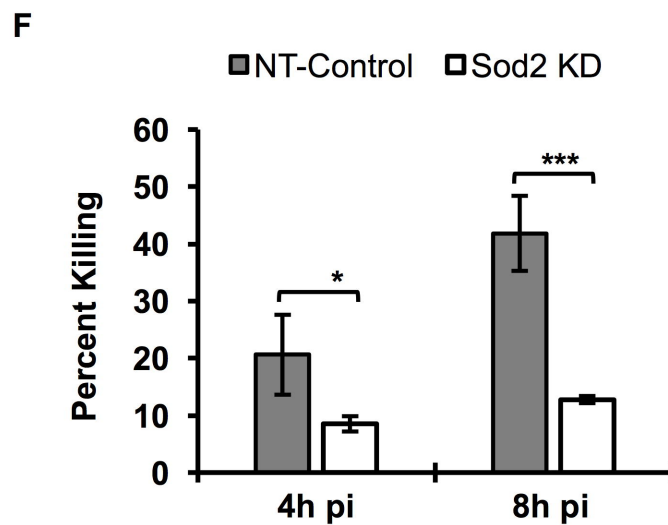

Source: http://biorxiv.org/content/10.1101/277004v1.full.pdf
